# Supplementary material for: Microphysiological model of PIK3CA-driven vascular malformations reveals a role of dysregulated Rac1 and mTORC1/2 in lesion formation
Source: PubMed Central journal article supplement — Sci Adv. 2023 Feb 15;9(7):eade8939. doi: 10.1126/sciadv.ade8939 (PMC9931220; doi:10.1126/sciadv.ade8939), 2023-02-15
Supplement: sciadv.ade8939_sm.pdf [file sciadv.ade8939_sm.pdf]

Supplementary Materials for

**Microphysiological model of PIK3CA-driven vascular malformations reveals  
a role of dysregulated Rac1 and mTORC1/2 in lesion formation**

Wen Yih Aw *et al.*

Corresponding author: William J. Polacheck, polacheck@unc.edu

*Sci. Adv.* **9**, eade8939 (2023)  
DOI: 10.1126/sciadv.ade8939

**The PDF file includes:**

Figs. S1 to S11  
Legends for movies S1 and S2  
Uncropped western blots  
Tabular format of data from all figures

**Other Supplementary Material for this manuscript includes the following:**

Movies S1 and S2

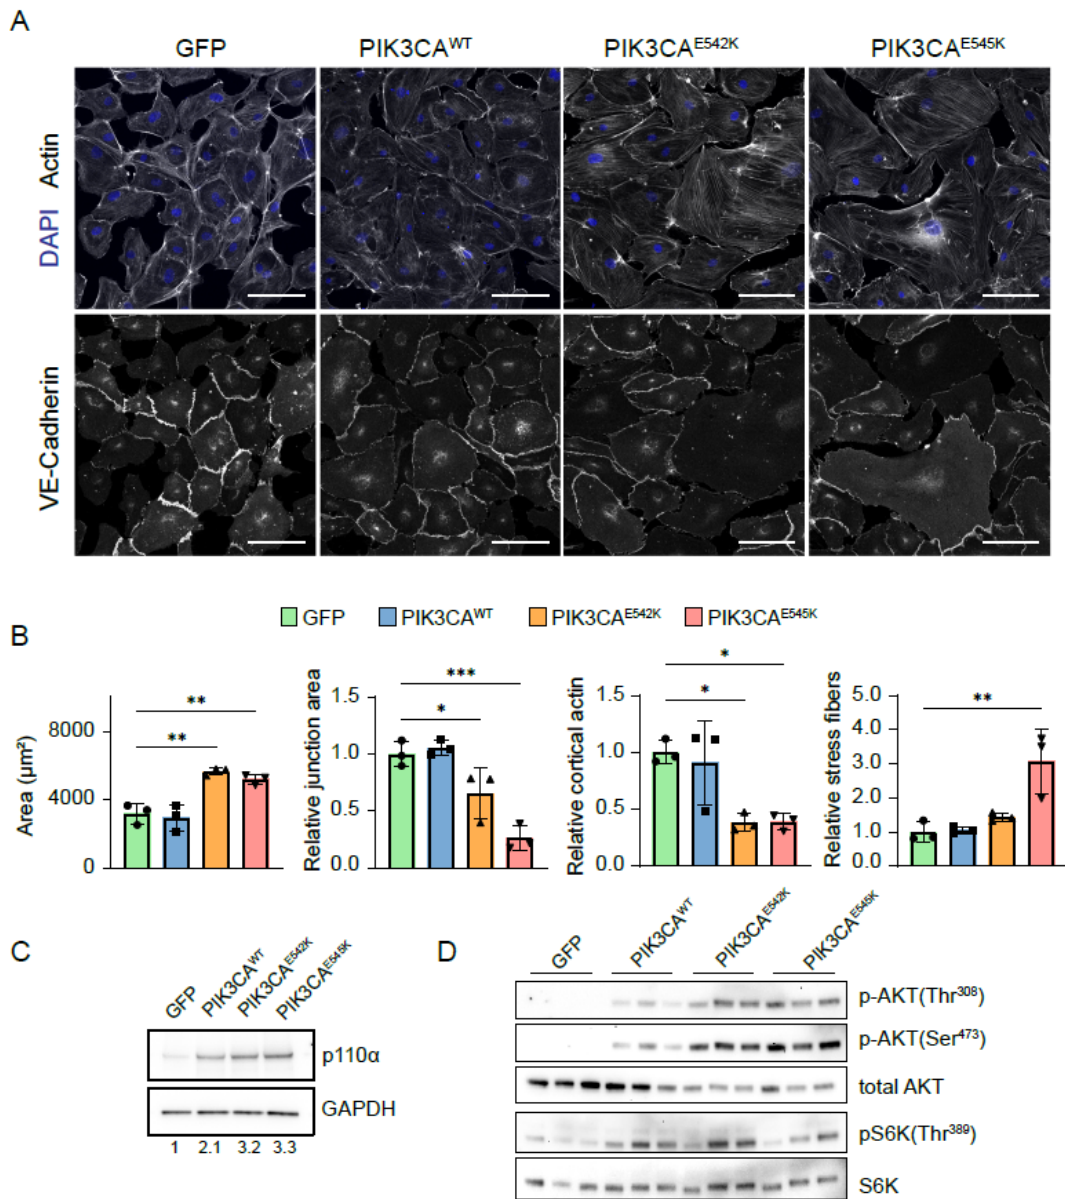

**Fig. S1. Increased PI3K/AKT activation and altered cytoskeletal organization in endothelial cells expressing *PIK3CA* activating mutations.**

(A) Representative confocal images of GFP, PIK3CA<sup>WT</sup>, PIK3CA<sup>E542K</sup>, and PIK3CA<sup>E545K</sup> cells stained for DAPI, Actin, and VE-Cadherin. Scale bar = 100 μm. (B) Quantification of cell area, relative junctional area measured from VE-cadherin staining, relative cortical actin, and stress fiber distributions of GFP, PIK3CA<sup>WT</sup>, PIK3CA<sup>E542K</sup>, and PIK3CA<sup>E545K</sup> cells. (n = 3; mean ± s.d; One-way ANOVA with Dunnett post-test, \*p ≤ 0.05; \*\*p ≤ 0.01; \*\*\*p ≤ 0.001). (C) Western blot and quantification of p110α expression level in GFP, PIK3CA<sup>WT</sup>, PIK3CA<sup>E542K</sup>, and PIK3CA<sup>E545K</sup> cells. (D) Western blot analysis of relative p-AKT1(Thr308), p-AKT1(Ser473) and p-S6K(Thr389) levels in GFP, PIK3CA<sup>WT</sup>, PIK3CA<sup>E542K</sup>, and PIK3CA<sup>E545K</sup> cells.

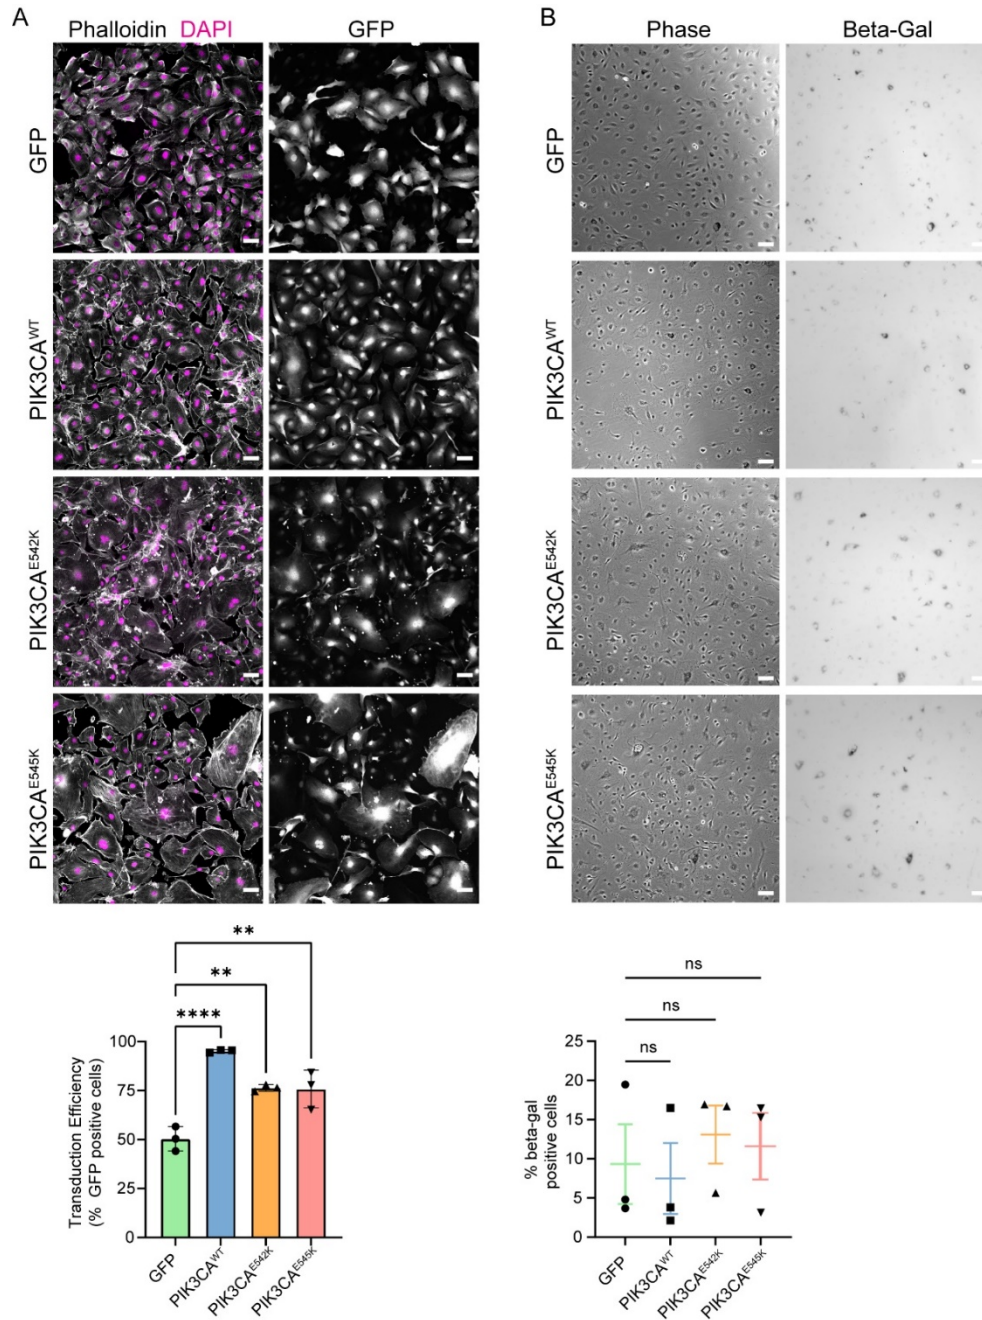

**Fig. S2. Characterization of transduction efficiency and senescence-associated beta-galactosidase markers in control and mutant endothelial cells.**

(A) Confocal images of GFP, PIK3CA<sup>WT</sup>, PIK3CA<sup>E542K</sup>, and PIK3CA<sup>E545K</sup> cells stained for DAPI, Actin, and GFP. Scale bar = 100  $\mu$ m. Quantification of transduction efficiency of control and cells expressing PIK3CA activating mutations (n = 3; mean  $\pm$  s.d; One-way ANOVA with Tukey post test, \*\* $p \leq 0.01$ ; \*\*\*\* $p \leq 0.0001$ ). (B)  $\beta$ -galactosidase staining and quantification for senescent cells. Scale bar = 100  $\mu$ m (n = 3; mean  $\pm$  s.e.m; One-way ANOVA with Tukey post-test, ns = not significant).

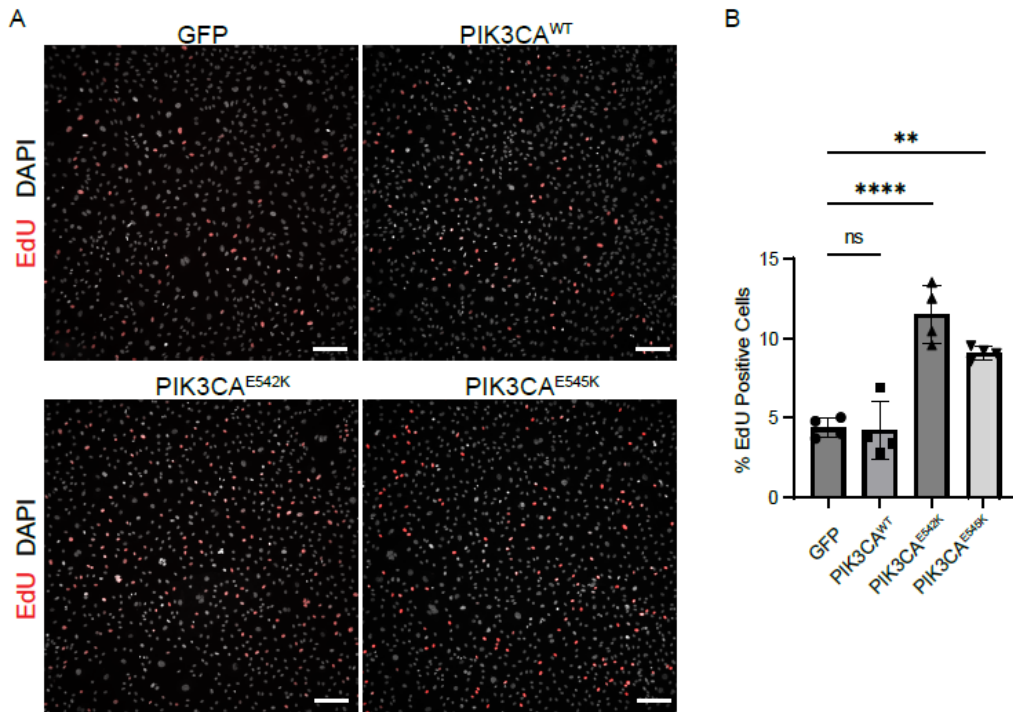

**Fig. S3. Elevated cell proliferation in PIK3CA mutant endothelial cells.**

(A) Representative images of GFP, PIK3CA<sup>WT</sup>, PIK3CA<sup>E542K</sup>, and PIK3CA<sup>E545K</sup> cells stained for DAPI and EdU. Cells were pulse-labeled for 30 minutes with EdU prior to fixation. Scale bar = 100  $\mu$ m. (B) Percentage of Edu positive labelled cells. (n = 4; mean  $\pm$  s.e.m; One-way ANOVA with Tukey post-test, ns = not significant, \*\*p  $\leq$  0.01; \*\*\*\*p  $\leq$  0.0001).

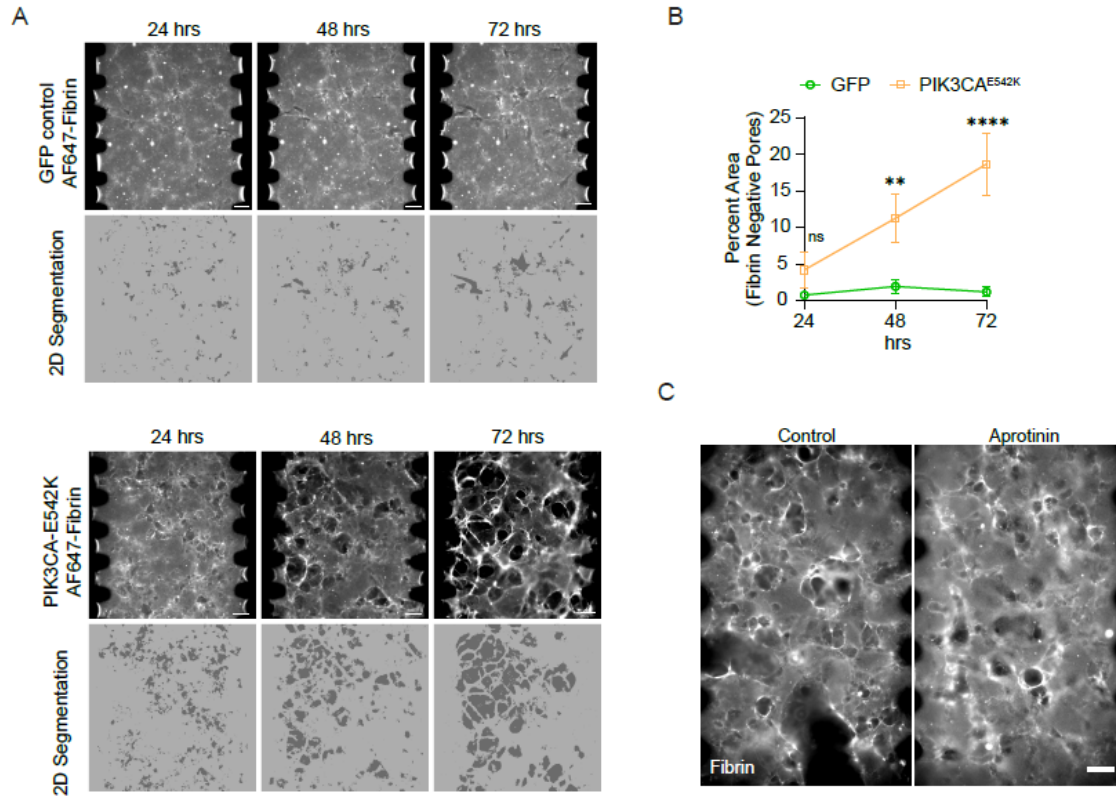

**Fig. S4. Dysregulated matrix remodeling and increased fibrinolysis in PIK3CA<sup>E542K</sup> vascular networks.**

(A) Wide-field images of control and PIK3CA<sup>E542K</sup> ECM. Fibrin ECM was fluorescently labeled with AF647-fibrinogen and binary masks for spaces void of fibrin signal were segmented for pore size and percent fibrin negative area quantification. Scale bar = 100  $\mu$ m. (B) Quantification of (A) ( $n = 3$  for GFP control and 6 PIK3CA<sup>E542K</sup> vascular network; mean  $\pm$  s.d.; One-way ANOVA with Tukey post-test, ns = not significant; \*\* $p \leq 0.01$ ; \*\*\*\* $p \leq 0.0001$ ). (C) Wide-field images of PIK3CAE542K ECM treated with 25 $\mu$ M of Aprotinin, an anti-fibrinolytic agent. Images were captured 24 hours after seeding. Note the decreased fibrin void formation with aprotinin treatment.

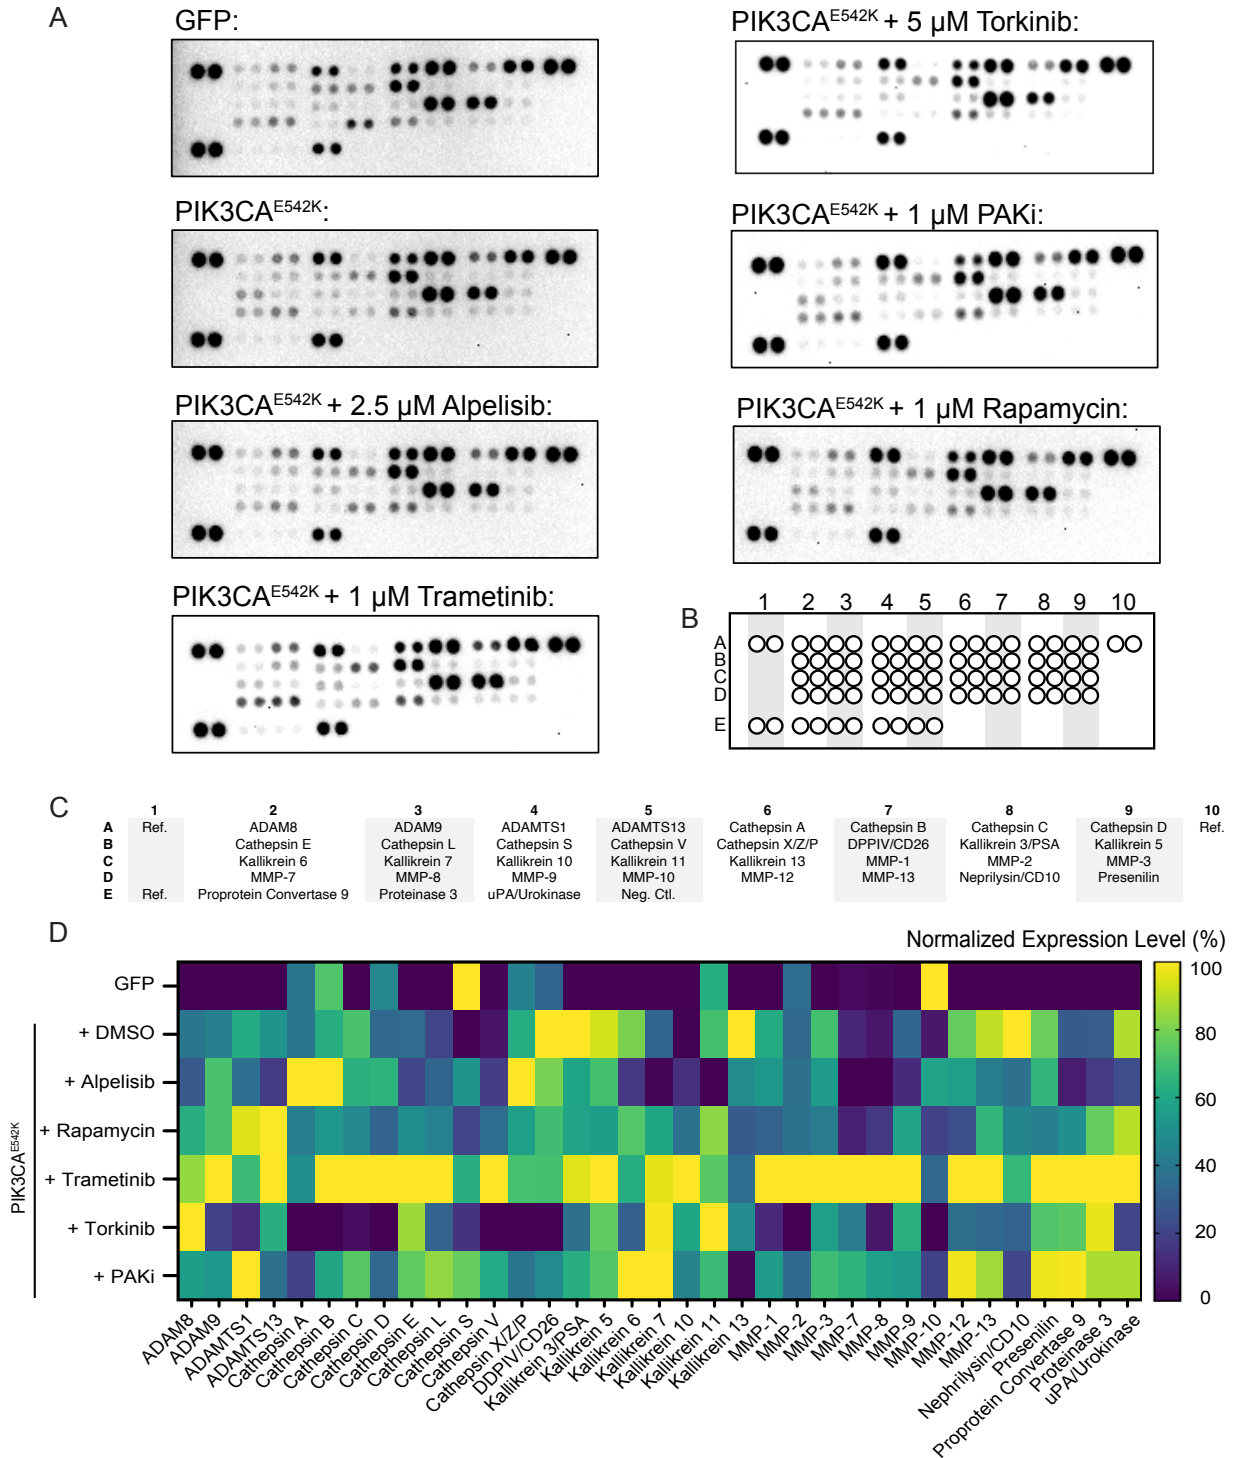

**Fig. S5. Expression profile of proteases secreted by GFP control treated with DMSO, PIK3CA<sup>E542K</sup> treated with DMSO, and PIK3CA<sup>E542K</sup> cells treated with Alpelisib, Rapamycin, Trametinib, Torkinib, or PAK inhibitor (PF-3758039).**

(A) Western blot analysis of secreted proteases in conditioned media of endothelial cells cultured overnight with DMSO or respective drug treatments (n = 1). (B) Map of spots to indicate

individual proteins as indicated in (C). Each protein is measured in duplicate (left and right spots under each labeled column). (D) Normalized protease expression profile of (A). The lowest average pixel intensity of each analyte across experimental conditions is defined as 0 %. The highest pixel intensity in each data set was set as 100 %.

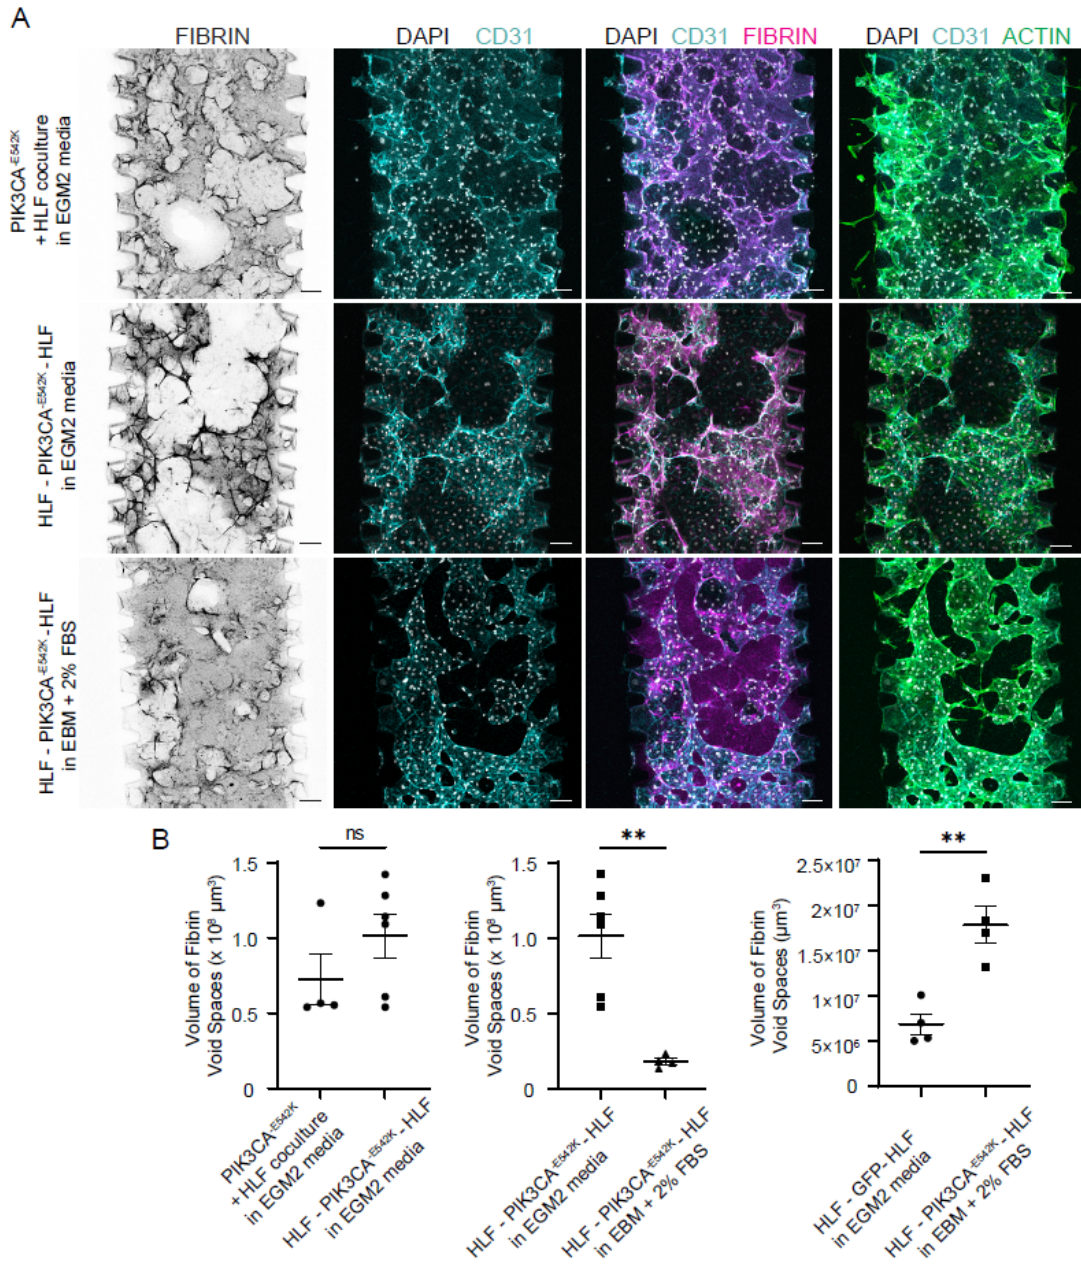

**Fig. S6. Characterization of vascular malformation-like phenotype in PIK3CA<sup>E542K</sup> vascular networks cultured under defined culture conditions.**

(A) Representative confocal images (maximum intensity projection of the bottom half of vascular networks) of PIK3CA<sup>E542K</sup> vascular networks labeled with Fibrin (magenta), DAPI (white), CD31 (cyan), and Actin (green). Vascular networks were generated by co-culturing endothelial cells and HLFs in the same compartment (PIK3CA<sup>E542K</sup> + HLF) or in different spatial compartments (HLF-PIK3CA<sup>E542K</sup> -HLF). Cells were cultured for 3 days in complete EGM2 media or in reduced growth factors media (EBM + 2% FBS). Scale bar = 100 μm. (B) Volumetric quantification of void spaces in fibrin hydrogel of vascular network formed in (A) (n ≥ 3; mean ± s.e.m; two-tailed unpaired Student t-test, ns = not significant; \*\*p ≤ 0.01).



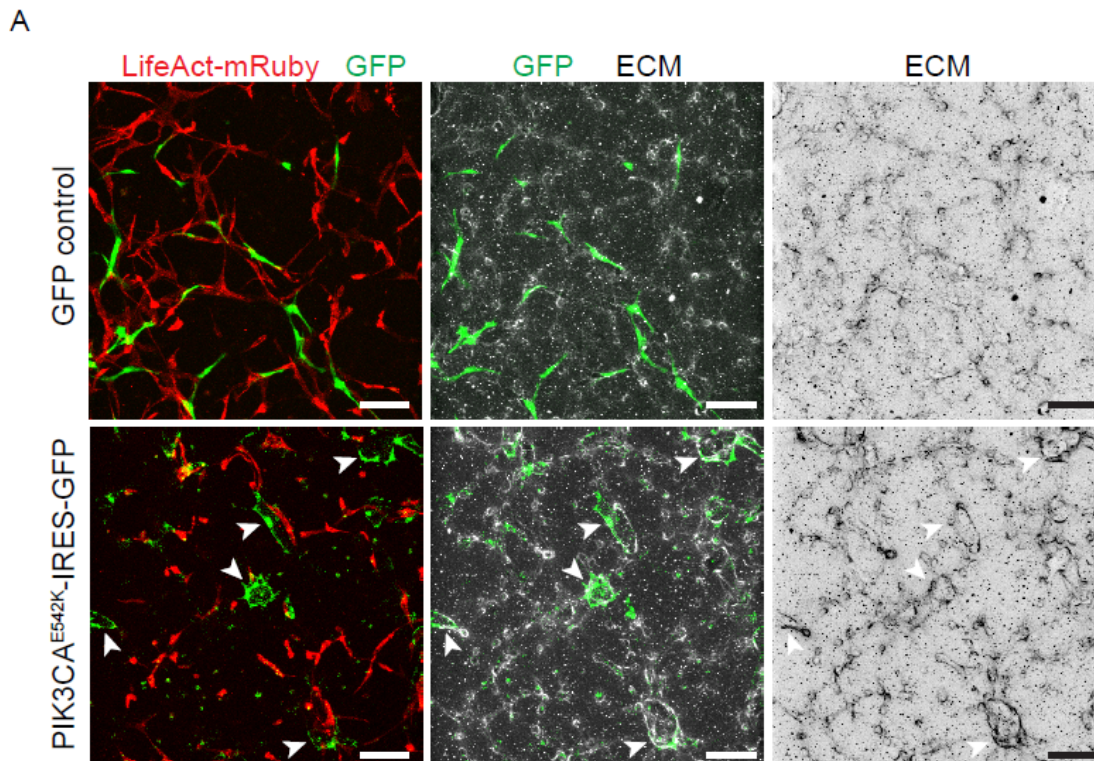

**Fig. S7. Localized ECM remodeling and lesion formation by PIK3CA<sup>E542K</sup> endothelial cells in mosaic vascular network.**

(A) Representative confocal images of mosaic control and PIK3CA<sup>E542K</sup> vascular networks. Mosaic vascular networks were generated by co-culturing GFP control (green) or PIK3CA<sup>E542K</sup> endothelial cells (green, highlighted with arrowhead) with endothelial cells stably expressing LifeAct-mRuby (red) at a ratio of 1:10. Scale bar = 50  $\mu$ m.

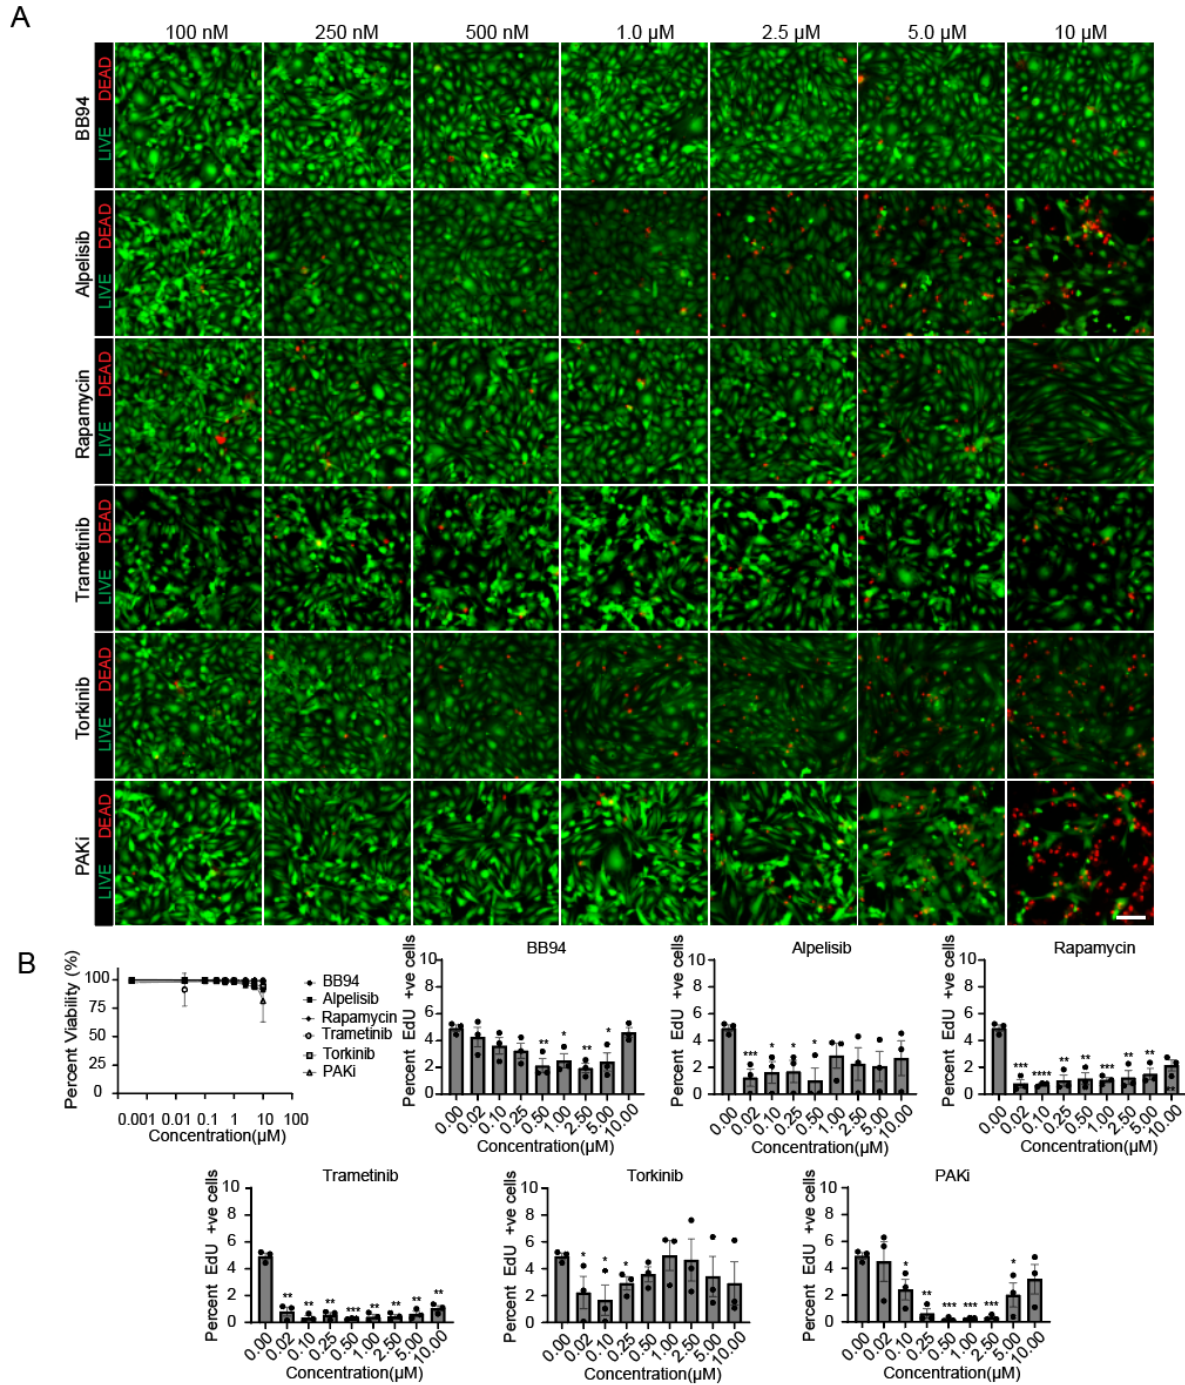

**Fig. S8. Cell proliferation and cytotoxicity analysis of drug treatments.**

(A) Representative images of PIK3CAE542K cells treated with increasing concentration of inhibitors. Live cells were labeled with Calcein AM (green). Dead cells were labeled with Propidium Iodide (red). Scale bar = 100  $\mu\text{m}$ . (B) Quantification of live/dead staining in (A) and changes in percent EdU positive cells with drug treatments ( $n = 3$ ; mean  $\pm$  s.e.m; two-tailed unpaired Student t-test to DMSO control, \* $p \leq 0.05$ ; \*\* $p \leq 0.01$ ; \*\*\* $p \leq 0.001$ , \*\*\*\* $p \leq 0.0001$ ).

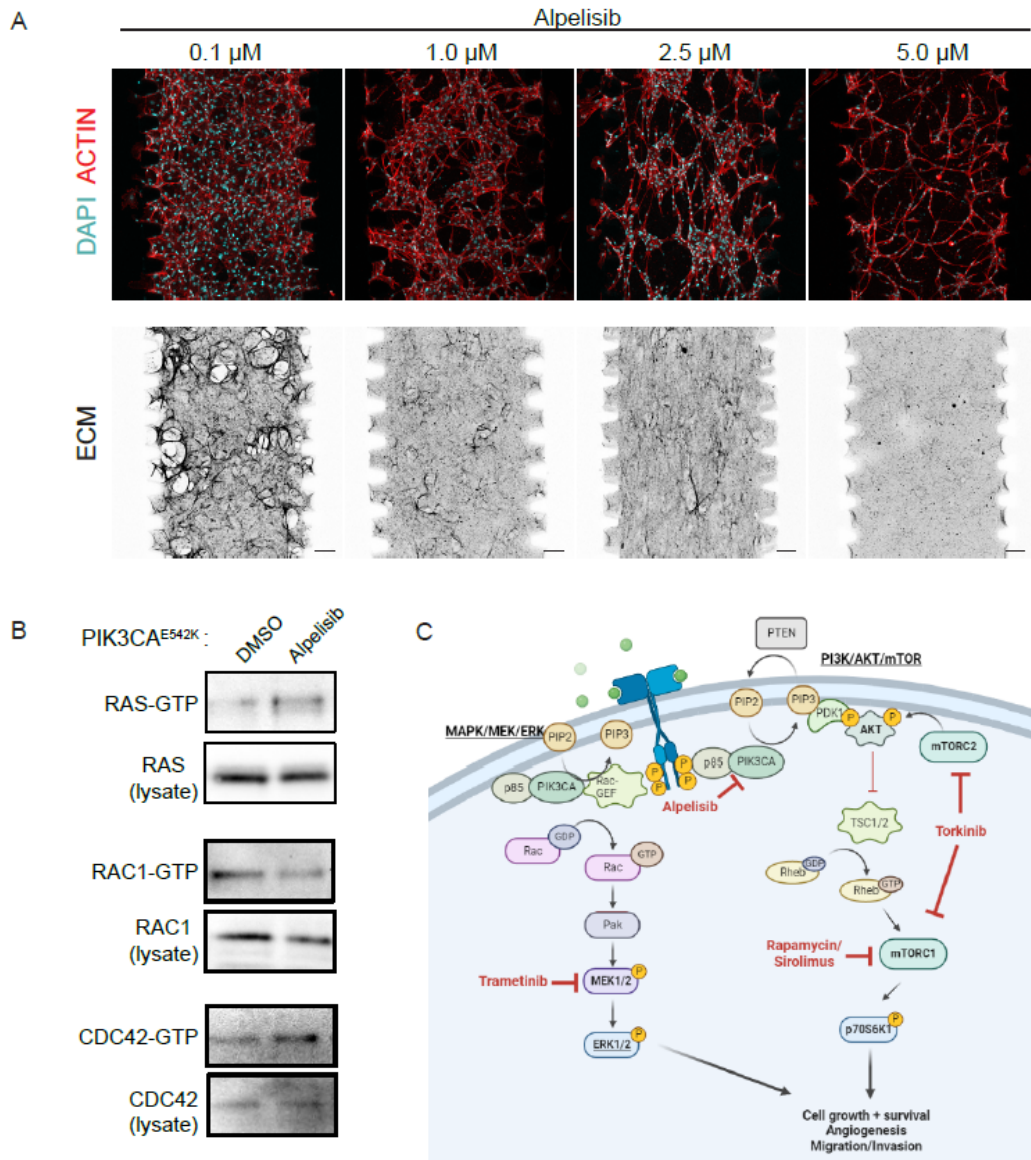

**Fig. S9. Effects of Alpelisib treatment on PIK3CA<sup>E542K</sup> vascular networks.**

(A) Representative ECM images of PIK3CA<sup>E542K</sup> vascular networks treated with low to high doses of Alpelisib. Scale bar = 100  $\mu\text{m}$ . (B) Active RAS, RAC1, and CDC42 were isolated from PIK3CA<sup>E542K</sup> cell lysates using GST-Raf-RBD and GST-PBD pull-down. Cells were cultured in a reduced serum condition (0.5 % FBS) and were stimulated with complete EGM2 medium with DMSO or 1.0  $\mu\text{M}$  Alpelisib for 10 minutes before lysis (n = 1). (C) Schematic representation of dysregulated PI3K/AKT/mTOR and MEK/ERK signaling in PIK3CA mutant cells. Schematic was created with BioRender.com. Tested inhibitors in this study are highlighted in red.

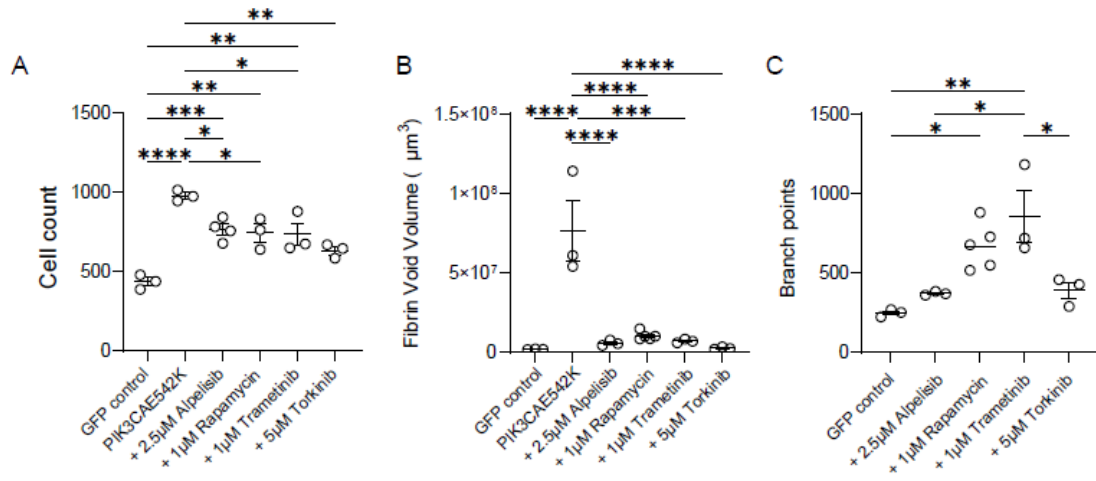

**Fig. S10. Effects of Alpelisib, Rapamycin, Trametinib, and Torkinib treatment on PIK3CA<sup>E542K</sup> vascular network topology.**

(A-C) Quantification of changes in total cell number (A), matrix (B) and vessel branching morphology (C) with drug inhibitions ( $n \geq 3$ ; mean  $\pm$  s.e.m; One-way ANOVA with Tukey post-test, \* $p \leq 0.05$ ; \*\* $p \leq 0.01$ ; \*\*\* $p \leq 0.001$ ; \*\*\*\* $p \leq 0.0001$ ).

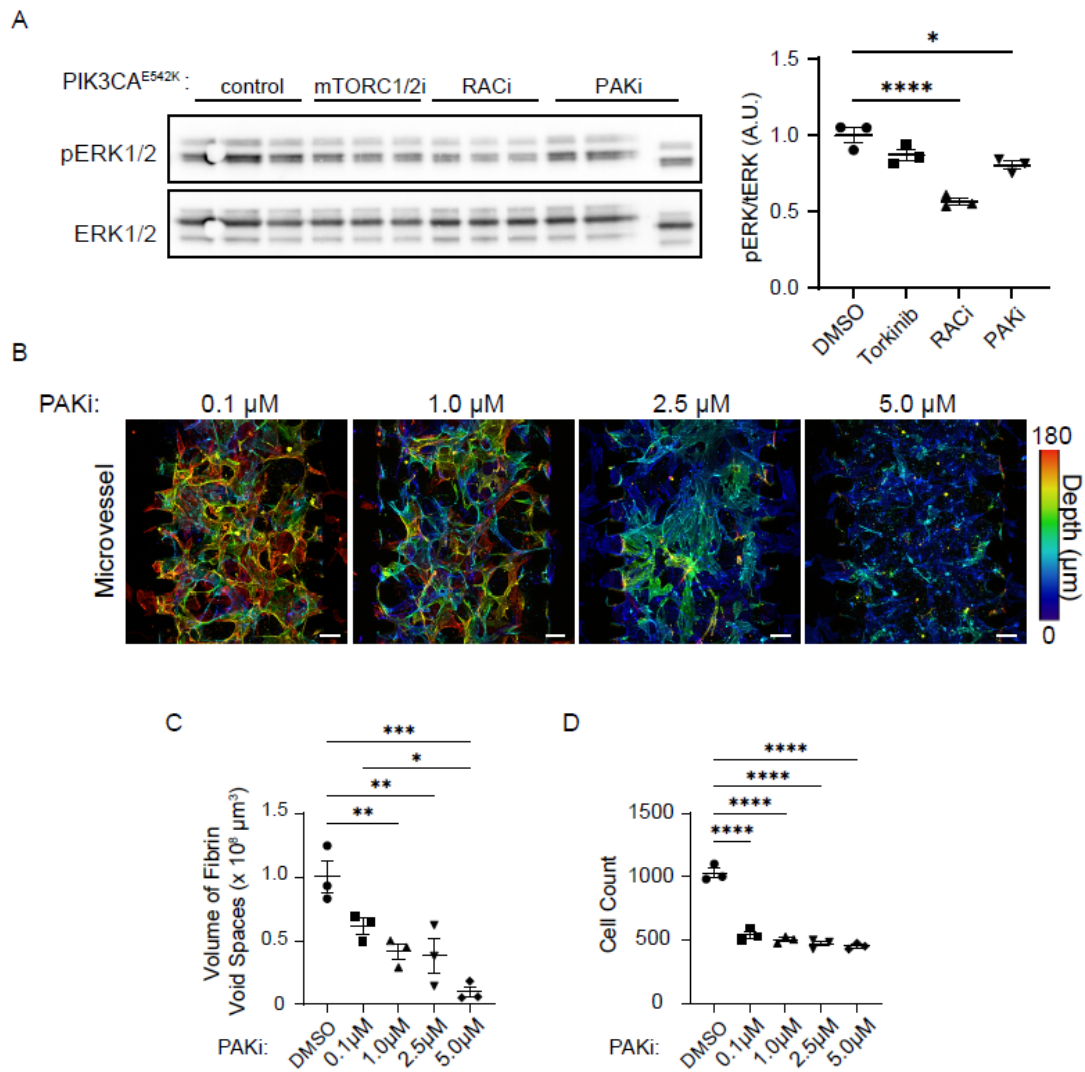

**Fig. S11. Effects of Pak inhibition on PIK3CA<sup>E542K</sup> vascular networks.**

(A) Western blot analysis and quantification of relative p-ERK1/2(Thr202/Tyr204) in PIK3CA<sup>E542K</sup> cells treated with DMSO, mTORC1/2 inhibitor (Torkinib PP242, 1 μM), RAC inhibitor (EHT 1864, 1 μM), or PAK inhibitor (PF-3758309, 1 μM) for 24 hours (n = 3; mean ± s.e.m; One-way ANOVA with Dunnett post-test). (B) Depth color coded projections of PIK3CA<sup>E542K</sup> vascular networks treated with 0.1 μM to 5.0 μM concentration of PAK inhibitor, PF-3758309. Scale bar = 100 μm. (C-D) Quantification of matrix morphology (C) and cell number (D) in PIK3CA<sup>E542K</sup> vascular networks treated with PAK inhibitor (n = 3; mean ± s.e.m; One-way ANOVA with Tukey post-test, \* $p \leq 0.05$ ; \*\* $p \leq 0.01$ ; \*\*\* $p \leq 0.001$ ; \*\*\*\* $p \leq 0.0001$ ).

**Movie S1.**

Formation of GFP control and PIK3CA<sup>E542K</sup> vascular networks over time.

**Movie S2.**

Example of GFP control and PIK3CA<sup>E542K</sup> cell membrane ruffling and cell migration.

Uncropped western blots

Figure 5F

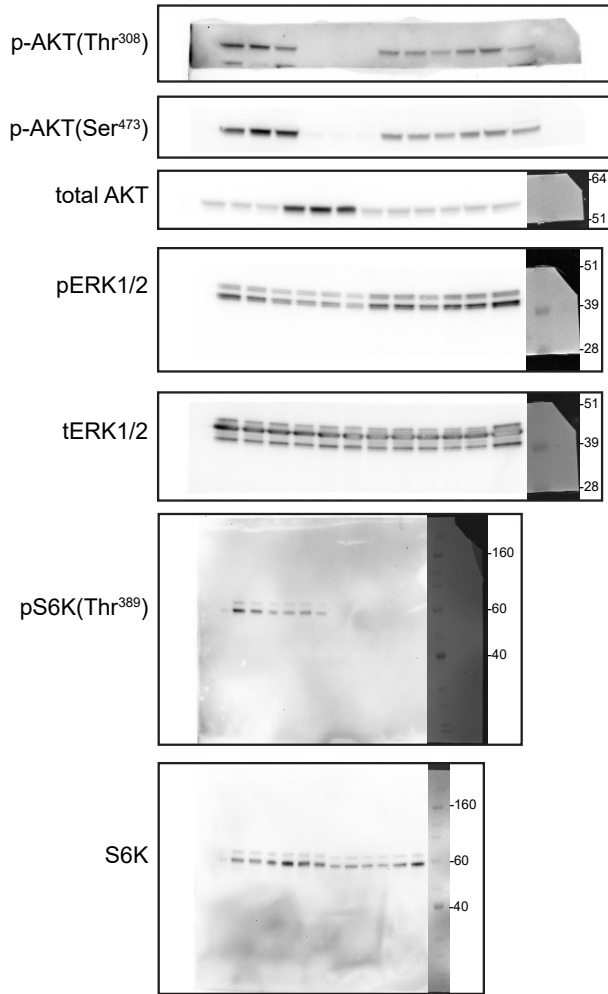

Figure 7A

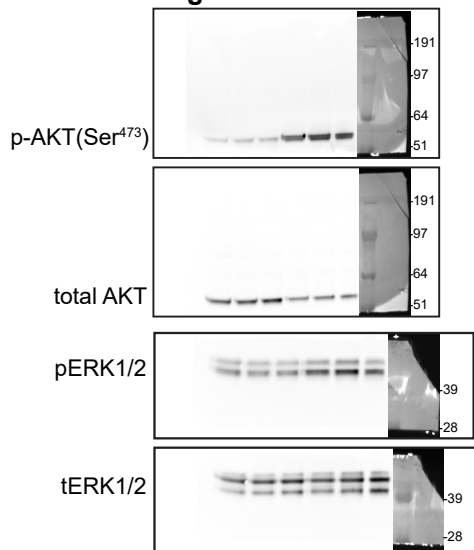

Figure 6A

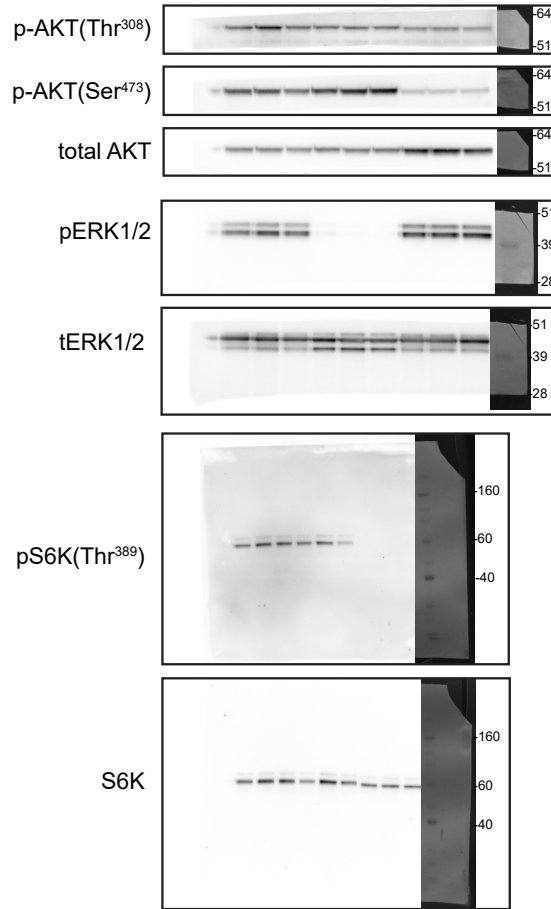

Figure 7E

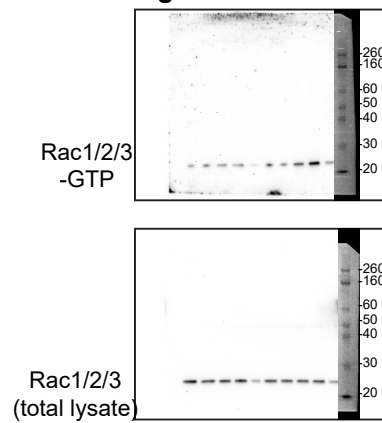

**Figure S1C**

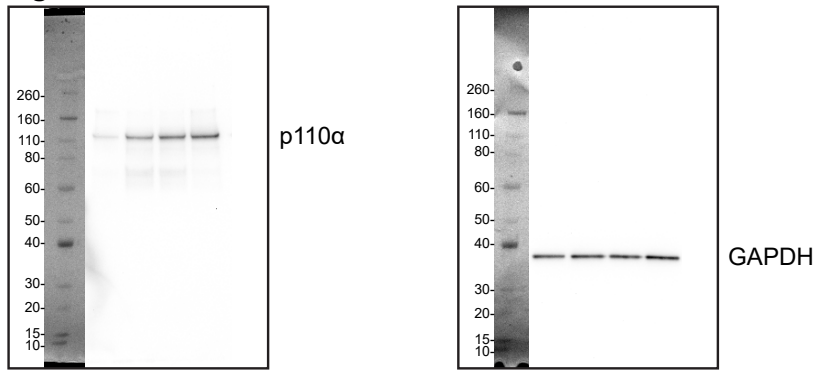

**Figure S1D**

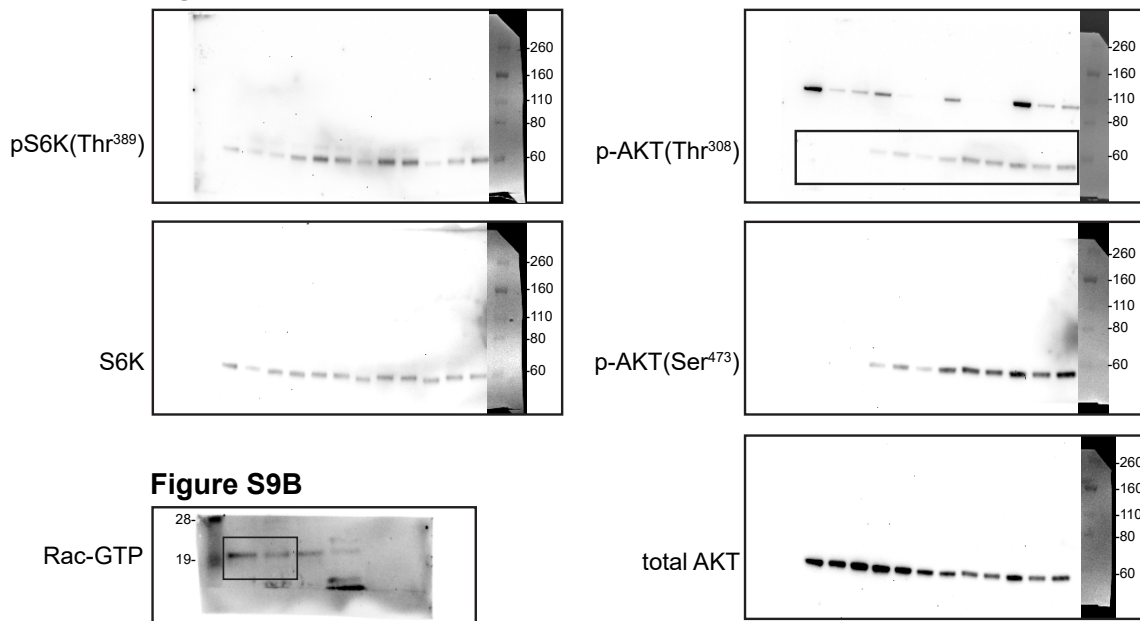

**Figure S9B**

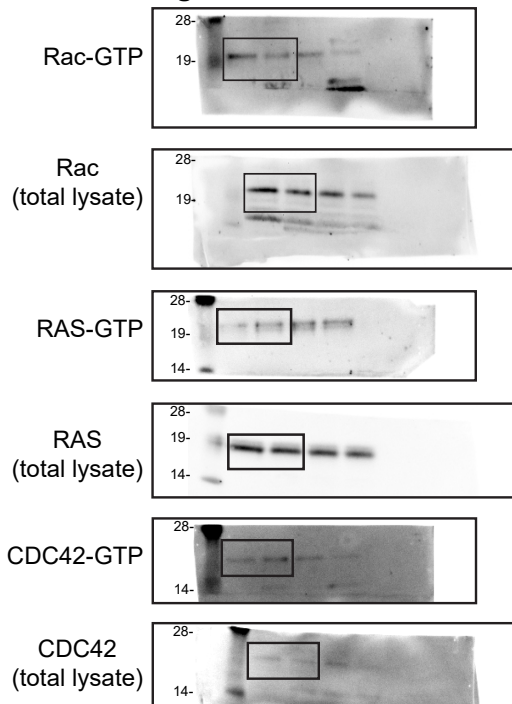

**Figure S11A**

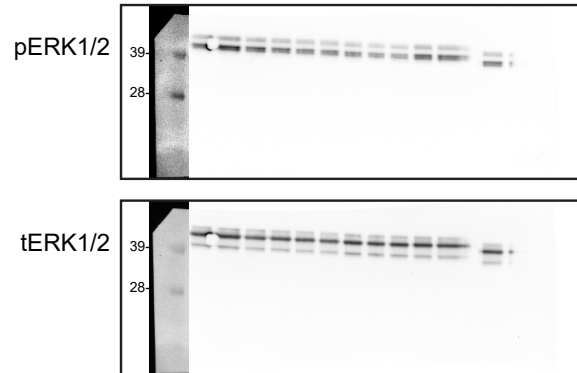



## Tabular data for all figures.

Figure 1d (Area Coverage)

|                                   | GFP 24hr    | WT 24hr            | 542 24hr         | 545 24hr | GFP 168hr        | WT 168hr    | 542 168hr   | 545 168hr   |
|-----------------------------------|-------------|--------------------|------------------|----------|------------------|-------------|-------------|-------------|
|                                   | 30.85       | 38.98              | 42.51            |          | 63.31            | 41.33       | 43.63       | 65.76       |
|                                   | 33.31       | 39.29              | 35.75            |          | 64.04            | 30.55       | 30.06       | 63.64       |
|                                   | 37.99       | 41.88              | 38.17            |          | 65.14            | 26.91       | 38.74       | 66.17       |
|                                   | 25.17       | 37.12              | 30.39            |          | 71.75            | 29.21       | 38.9        | 55.21       |
|                                   |             |                    | 35.95            |          | 62.52            |             |             | 57.61       |
|                                   |             |                    | 36.06            |          | 69.58            |             |             | 57.64       |
| Mean                              | 31.83       | 39.3175            | 36.47166667      |          | 66.05666667      | 32          | 37.8325     | 61.005      |
| SEM                               | 2.668520189 | 0.979373737        | 1.605146757      |          | 1.525203083      | 3.199526007 | 2.828219036 | 1.937883295 |
| Tukey's multiple comparisons test | Mean Diff.  | 95.00% CI of diff. | Below threshold? | Summary  | Adjusted P Value |             |             |             |
| GFP - 24hrs vs. WT - 24hrs        | -7.487      | -15.39 to 0.4135   | No               | ns       | 0.0664           |             |             |             |
| GFP - 24hrs vs. 542 - 24hrs       | -4.642      | -11.85 to 2.571    | No               | ns       | 0.2912           |             |             |             |
| GFP - 24hrs vs. 545 - 24hrs       | -34.23      | -41.44 to -27.01   | Yes              | ****     | <0.0001          |             |             |             |
| WT - 24hrs vs. 542 - 24hrs        | 2.846       | -4.367 to 10.06    | No               | ns       | 0.6777           |             |             |             |
| WT - 24hrs vs. 545 - 24hrs        | -26.74      | -33.95 to -19.53   | Yes              | ****     | <0.0001          |             |             |             |
| 542 - 24hrs vs. 545 - 24hrs       | -29.59      | -36.04 to -23.13   | Yes              | ****     | <0.0001          |             |             |             |
| GFP - 168 Hrs vs. WT - 168 Hrs    | -5.833      | -17.32 to 5.658    | No               | ns       | 0.4871           |             |             |             |
| GFP - 168 Hrs vs. 542 - 168 Hrs   | -29.01      | -39.49 to -18.52   | Yes              | ****     | <0.0001          |             |             |             |
| GFP - 168 Hrs vs. 545 - 168 Hrs   | -31.85      | -42.34 to -21.36   | Yes              | ****     | <0.0001          |             |             |             |
| WT - 168 Hrs vs. 542 - 168 Hrs    | -23.17      | -33.66 to -12.68   | Yes              | ****     | <0.0001          |             |             |             |
| WT - 168 Hrs vs. 545 - 168 Hrs    | -26.02      | -36.51 to -15.53   | Yes              | ****     | <0.0001          |             |             |             |
| 542 - 168 Hrs vs. 545 - 168 Hrs   | -2.845      | -12.23 to 6.537    | No               | ns       | 0.8213           |             |             |             |

Figure 1d (Norm Network Thickness)

|                                   | GFP         | WT                 | 542              | 545         |                  |
|-----------------------------------|-------------|--------------------|------------------|-------------|------------------|
|                                   | 0.75422159  | 0.88686131         | 0.64712932       | 0.32138577  |                  |
|                                   | 1.08168101  | 0.78725896         | 0.56623815       | 0.32138577  |                  |
|                                   | 1.01397211  | 0.78725896         | 0.88980281       | 0.35352435  |                  |
|                                   | 1.15012529  | 0.9045103          | 0.77655518       | 0.32138577  |                  |
|                                   |             |                    |                  | 0.30531648  |                  |
|                                   |             |                    |                  | 0.30531648  |                  |
| Mean                              | 1           | 0.8415             | 0.7199           | 0.3214      |                  |
| SEM                               | 0.086511867 | 0.031506777        | 0.071288327      | 0.008801513 |                  |
| Tukey's multiple comparisons test | Mean Diff.  | 95.00% CI of diff. | Below threshold? | Summary     | Adjusted P Value |
| GFP vs. PIK3CA-WT                 | 0.1585      | -0.06409 to 0.3811 | No               | ns          | 0.2104           |
| GFP vs. PIK3CA-E542K              | 0.2801      | 0.05745 to 0.5027  | Yes              | *           | 0.0122           |
| GFP vs. PIK3CA-E545K              | 0.6786      | 0.4754 to 0.8818   | Yes              | ****        | <0.0001          |
| PIK3CA-WT vs. PIK3CA-E542K        | 0.1215      | -0.1011 to 0.3442  | No               | ns          | 0.4167           |
| PIK3CA-WT vs. PIK3CA-E545K        | 0.5201      | 0.3169 to 0.7233   | Yes              | ****        | <0.0001          |
| PIK3CA-E542K vs. PIK3CA-E545K     | 0.3985      | 0.1953 to 0.6018   | Yes              | ***         | 0.0003           |

Figure 1d (Average Pore Size  
micron<sup>2</sup>)

|                                   | GFP 24hr    | PIK3CA 24hr        | GFP 48hr         | PIK3CA 48hr | GFP 72hr         | PIK3CA 72hr |
|-----------------------------------|-------------|--------------------|------------------|-------------|------------------|-------------|
|                                   | 1546.043    | 2034.924           | 1381.741         | 1957.631    | 1689.239         | 3771.092    |
|                                   | 1219.311    | 2344.534           | 1351.683         | 2471.779    | 1181.039         | 4328.325    |
|                                   | 1126.589    | 1091.13            | 1600.062         | 1874.401    | 901.511          | 2715.362    |
|                                   |             | 1796.101           |                  | 2485.222    |                  | 4628.513    |
|                                   |             | 1848.835           |                  | 2058.654    |                  | 5917.799    |
|                                   |             | 1801.728           |                  | 2142.79     |                  | 5338.183    |
| Mean                              | 1297.314333 | 1819.542           | 1444.495333      | 2165.0795   | 1257.263         | 4449.879    |
| SEM                               | 127.2122    | 168.7518           | 78.2658          | 105.8155    | 230.5692         | 464.0352    |
| Tukey's multiple comparisons test | Mean Diff.  | 95.00% CI of diff. | Below threshold? | Summary     | Adjusted P Value |             |
| GFP 24hr vs. PIK3CA 24hr          | -522.2      | -1896 to 851.9     | No               | ns          | 0.8371           |             |
| GFP 24hr vs. GFP 48hr             | -147.2      | -1734 to 1440      | No               | ns          | 0.9997           |             |
| GFP 24hr vs. PIK3CA 48hr          | -867.8      | -2242 to 506.4     | No               | ns          | 0.3879           |             |
| GFP 24hr vs. GFP 72hr             | 40.05       | -1547 to 1627      | No               | ns          | >0.9999          |             |
| GFP 24hr vs. PIK3CA 72hr          | -3153       | -4527 to -1778     | Yes              | ****        | <0.0001          |             |
| PIK3CA 24hr vs. GFP 48hr          | 375         | -999.1 to 1749     | No               | ns          | 0.9533           |             |
| PIK3CA 24hr vs. PIK3CA 48hr       | -345.5      | -1468 to 776.4     | No               | ns          | 0.9244           |             |
| PIK3CA 24hr vs. GFP 72hr          | 562.3       | -811.9 to 1936     | No               | ns          | 0.7922           |             |
| PIK3CA 24hr vs. PIK3CA 72hr       | -2630       | -3752 to -1508     | Yes              | ****        | <0.0001          |             |
| GFP 48hr vs. PIK3CA 48hr          | -720.6      | -2095 to 653.6     | No               | ns          | 0.5827           |             |
| GFP 48hr vs. GFP 72hr             | 187.2       | -1399 to 1774      | No               | ns          | 0.999            |             |
| GFP 48hr vs. PIK3CA 72hr          | -3005       | -4380 to -1631     | Yes              | ****        | <0.0001          |             |
| PIK3CA 48hr vs. GFP 72hr          | 907.8       | -466.3 to 2282     | No               | ns          | 0.3409           |             |
| PIK3CA 48hr vs. PIK3CA 72hr       | -2285       | -3407 to -1163     | Yes              | ****        | <0.0001          |             |
| GFP 72hr vs. PIK3CA 72hr          | -3193       | -4567 to -1818     | Yes              | ****        | <0.0001          |             |

Figure 2b (Volume of Fibrin Void Space)

|                                      | GFP        | PIK3CA-E542K            | PIK3CA-E542K no HLF |         |                  |
|--------------------------------------|------------|-------------------------|---------------------|---------|------------------|
|                                      | 1378310    | 59787357                | 22542606.81         |         |                  |
|                                      | 1776301    | 51188532                | 32820259            |         |                  |
|                                      | 1501003    | 95825764                | 39937440.14         |         |                  |
|                                      |            |                         | 47498128.07         |         |                  |
| MEAN                                 | 1551871.3  | 68933884.3              | 35699608.5          |         |                  |
| SEM                                  | 117671.7   | 13673146.9              | 5311635.2           |         |                  |
| Tukey's multiple comparisons test    | Mean Diff. | 95.00% CI of diff.      | Below threshold?    | Summary | Adjusted P Value |
| GFP control vs. PIK3CA-E542K         | 67382013   | -102114138 to -32649888 | Yes                 | **      | 0.0018           |
| GFP control vs. PIK3CA-E542K no HLF  | 34147737   | -66636666 to -1658809   | Yes                 | *       | 0.0408           |
| PIK3CA-E542K vs. PIK3CA-E542K no HLF | 33234276   | 745347 to 65723204      | Yes                 | *       | 0.0456           |

Figure 4b (Cell count)

|                                       | GFP control | DMSO control       | mitoC            | BB94    | Y27632           |
|---------------------------------------|-------------|--------------------|------------------|---------|------------------|
|                                       | 439         | 871                | 408              | 847     | 834              |
|                                       | 481         | 856                | 395              | 824     | 840              |
|                                       | 389         | 786                | 429              | 730     | 882              |
| MEAN                                  | 436.3       | 837.7              | 410.7            | 800.3   | 852              |
| SEM                                   | 26.5916     | 26.1937            | 9.9051           | 35.7880 | 15.0997          |
| Tukey's multiple comparisons test     | Mean Diff.  | 95.00% CI of diff. | Below threshold? | Summary | Adjusted P Value |
| GFP control vs. untreated PIK3CAE542K | -401.3      | -515.3 to -287.3   | Yes              | ****    | <0.0001          |
| GFP control vs. mitoC                 | 25.67       | -88.34 to 139.7    | No               | ns      | 0.9416           |
| GFP control vs. 1uM BB94              | -364        | -478.0 to -250.0   | Yes              | ****    | <0.0001          |
| GFP control vs. 10uM Y27362           | -415.7      | -529.7 to -301.7   | Yes              | ****    | <0.0001          |
| DMSO control vs. mitoC                | 427         | 313.0 to 541.0     | Yes              | ****    | <0.0001          |
| DMSO control vs. 1uM BB94             | 37.33       | -76.68 to 151.3    | No               | ns      | 0.8138           |
| DMSO control vs. 10uM Y27362          | -14.33      | -128.3 to 99.68    | No               | ns      | 0.9929           |
| mitoC vs. 1uM BB94                    | -389.7      | -503.7 to -275.7   | Yes              | ****    | <0.0001          |
| mitoC vs. 10uM Y27362                 | -441.3      | -555.3 to -327.3   | Yes              | ****    | <0.0001          |
| 1uM BB94 vs. 10uM Y27362              | -51.67      | -165.7 to 62.34    | No               | ns      | 0.5894           |

Figure 4b (Volume of Fibrin Void Space)

|                                   | GFP control | DMSO control            | mitoC            | BB94        | Y27632           |
|-----------------------------------|-------------|-------------------------|------------------|-------------|------------------|
|                                   | 1378310     | 59787357                | 33527609         | 4564840     | 60674538         |
|                                   | 1776301     | 51188532                | 11942848         | 4757205     | 54279421         |
|                                   | 1501003     | 95825764                | 16849576         | 5556684     | 41703539         |
| MEAN                              | 1551871.333 | 68933884.33             | 20773344.33      | 4959576.333 | 52219166         |
| SEM                               | 117671.7178 | 13673146.9415           | 6532545.3260     | 303674.3033 | 5572497.6077     |
| Tukey's multiple comparisons test | Mean Diff.  | 95.00% CI of diff.      | Below threshold? | Summary     | Adjusted P Value |
| GFP control vs. DMSO control      | -67382013   | -100995412 to -33768614 | Yes              | ***         | 0.0005           |
| GFP control vs. mitoC             | -19221473   | -52834872 to 14391926   | No               | ns          | 0.3843           |
| GFP control vs. 1uM BB94          | -3407705    | -37021104 to 30205694   | No               | ns          | 0.9969           |
| GFP control vs. 10uM Y27362       | -50667295   | -84280693 to 17053896   | Yes              | **          | 0.004            |
| DMSO control vs. mitoC            | 48160540    | 14547141 to 81773939    | Yes              | **          | 0.0057           |
| DMSO control vs. 1uM BB94         | 63974308    | 30360909 to 97587707    | Yes              | ***         | 0.0007           |
| DMSO control vs. 10uM Y27362      | 16714718    | -16898680 to 50328117   | No               | ns          | 0.5089           |
| mitoC vs. 1uM BB94                | 15813768    | -17799631 to 49427167   | No               | ns          | 0.5575           |
| mitoC vs. 10uM Y27362             | -31445822   | -65059220 to 2167577    | No               | ns          | 0.0695           |
| 1uM BB94 vs. 10uM Y27362          | -47259590   | -80872988 to 13646191   | Yes              | **          | 0.0065           |

Figure 4c (Branch Points Count)

|                                   | GFP control | mitoC              | BB94             |         |                  |
|-----------------------------------|-------------|--------------------|------------------|---------|------------------|
|                                   | 265         | 821                | 1210             |         |                  |
|                                   | 248         | 662                | 1523             |         |                  |
|                                   | 219         | 505                | 2204             |         |                  |
| MEAN                              | 244         | 662.666667         | 1645.666667      |         |                  |
| SEM                               | 13.4288     | 91.2220            | 293.4248         |         |                  |
| Tukey's multiple comparisons test | Mean Diff.  | 95.00% CI of diff. | Below threshold? | Summary | Adjusted P Value |
| GFP control vs. mitoC             | -418.7      | -1189 to 351.9     | No               | ns      | 0.2915           |
| GFP control vs. BB94              | -1402       | -2172 to -631.1    | Yes              | **      | 0.0034           |
| mitoC vs. BB94                    | -983        | -1754 to -212.5    | Yes              | *       | 0.0184           |

Figure 4d (Mean Segment Length)

|                                   | GFP control | mitoC 542          | BB94 542         |         |                  |
|-----------------------------------|-------------|--------------------|------------------|---------|------------------|
|                                   | 49.73214    | 39.10894           | 35.78064         |         |                  |
|                                   | 54.52732    | 43.8047            | 33.65594         |         |                  |
|                                   | 53.33863    | 39.91494           | 34.84538         |         |                  |
| Tukey's multiple comparisons test | Mean Diff.  | 95.00% CI of diff. | Below threshold? | Summary | Adjusted P Value |
| GFP control vs. mitoC             | 11.59       | 6.241 to 16.94     | Yes              | **      | 0.0014           |
| GFP control vs. BB94              | 17.77       | 12.42 to 23.12     | Yes              | ***     | 0.0001           |
| mitoC vs. BB94                    | 6.182       | 0.8336 to 11.53    | Yes              | *       | 0.0281           |

Figure 5b (Cell count)

|                                   | DMSO        | Rapamycin          | Alpelisib        |         |                  |
|-----------------------------------|-------------|--------------------|------------------|---------|------------------|
|                                   | 976         | 641                | 679              |         |                  |
|                                   | 1015        | 764                | 758              |         |                  |
|                                   | 947         | 833                | 844              |         |                  |
|                                   |             |                    | 784              |         |                  |
| MEAN                              | 979.3333333 | 746                | 766.25           |         |                  |
| SEM                               | 19.7005     | 56.1516            | 34.2062          |         |                  |
| Tukey's multiple comparisons test | Mean Diff.  | 95.00% CI of diff. | Below threshold? | Summary | Adjusted P Value |
| DMSO vs. Sirolimus                | 233.3       | 62.60 to 404.1     | Yes              | *       | 0.0122           |
| DMSO vs. Alpelisib                | 213.1       | 53.38 to 372.8     | Yes              | *       | 0.0137           |
| Rapamycin vs. Alpelisib           | -20.25      | -180.0 to 139.5    | No               | ns      | 0.9268           |

Figure 5c (Volume of Fibrin Void Spaces)

|                                   | DMSO          | GFP                   | Rapamycin        | Alpelisib    |                  |
|-----------------------------------|---------------|-----------------------|------------------|--------------|------------------|
|                                   | 114000000     | 1378310               | 8182002          | 5228440      |                  |
|                                   | 60849879      | 1776301               | 9827182          | 7490028      |                  |
|                                   | 53909663      | 1501003               | 14530380         | 4045672      |                  |
| MEAN                              | 76253180.67   | 1551871.333           | 10846521.33      | 5588046.667  |                  |
| SEM                               | 18979448.7703 | 117671.7178           | 1902171.1556     | 1010426.4413 |                  |
| Tukey's multiple comparisons test | Mean Diff.    | 95.00% CI of diff.    | Below threshold? | Summary      | Adjusted P Value |
| DMSO vs. GFP control              | 74701309      | 31447470 to 117955148 | Yes              | **           | 0.0025           |
| DMSO vs. Rapamycin                | 65406659      | 22152820 to 108660498 | Yes              | **           | 0.0056           |
| DMSO vs. Alpelisib                | 70665134      | 27411295 to 113918973 | Yes              | **           | 0.0035           |
| GFP control vs. Rapamycin         | -9294650      | -52548489 to 33959189 | No               | ns           | 0.8988           |
| GFP control vs. Alpelisib         | -4036175      | -47290014 to 39217664 | No               | ns           | 0.99             |
| Rapamycin vs. Alpelisib           | 5258475       | -37995364 to 48512314 | No               | ns           | 0.9786           |

Figure 5d (Mean Segment Length)

|                                   | GFP         | Rapamycin          | Alpelisib        |         |                  |
|-----------------------------------|-------------|--------------------|------------------|---------|------------------|
|                                   | 54.52732    | 38.68098           | 47.54549         |         |                  |
|                                   | 49.73214    | 35.08685           | 52.42514         |         |                  |
|                                   | 53.33863    | 38.97669           | 46.79459         |         |                  |
|                                   |             | 43.22453           |                  |         |                  |
|                                   |             | 37.18176           |                  |         |                  |
| MEAN                              | 52.53269667 | 38.630162          | 48.92174         |         |                  |
| SEM                               | 1.4417      | 1.3395             | 1.7651           |         |                  |
| Tukey's multiple comparisons test | Mean Diff.  | 95.00% CI of diff. | Below threshold? | Summary | Adjusted P Value |
| GFP vs. Rapamycin                 | 13.9        | 7.861 to 19.94     | Yes              | ***     | 0.0004           |
| GFP vs. Alpelisib                 | 3.611       | -3.143 to 10.37    | No               | ns      | 0.3292           |
| Rapamycin vs. Alpelisib           | -10.29      | -16.33 to -4.250   | Yes              | **      | 0.0031           |

Figure 5e (Branch Point Count)

|                                   | GFP        | Rapamycin          | Alpelisib        |         |                  |
|-----------------------------------|------------|--------------------|------------------|---------|------------------|
|                                   | 219        | 545                | 366              |         |                  |
|                                   | 265        | 513                | 357              |         |                  |
|                                   | 248        | 878                | 380              |         |                  |
|                                   |            | 674                |                  |         |                  |
|                                   |            | 724                |                  |         |                  |
| MEAN                              | 244        | 666.8              | 367.6666667      |         |                  |
| SEM                               | 13.4288    | 65.7339            | 6.6916           |         |                  |
| Tukey's multiple comparisons test | Mean Diff. | 95.00% CI of diff. | Below threshold? | Summary | Adjusted P Value |
| GFP vs. Rapamycin                 | -422.8     | -641.4 to -204.2   | Yes              | **      | 0.0014           |
| GFP vs. Alpelisib                 | -123.7     | -368.0 to 120.7    | No               | ns      | 0.3645           |
| Rapamycin vs. Alpelisib           | 299.1      | 80.56 to 517.7     | Yes              | *       | 0.0111           |

Fig 5F- pAKT308

|                                   | DMSO       | Alpelisib          | 20nM Rapamycin   | 1uM Rapamycin |                  |  |
|-----------------------------------|------------|--------------------|------------------|---------------|------------------|--|
|                                   | 1.266717   | 0.020655           | 0.66835          | 0.587048      |                  |  |
|                                   | 1.141618   | 0.028965           | 0.536179         | 0.474362      |                  |  |
|                                   | 0.591665   | 0.016542           | 0.635932         | 0.380224      |                  |  |
| MEAN                              | 1          | 0.022054           | 0.613487         | 0.480544667   |                  |  |
| SEM                               | 0.2073     | 0.0037             | 0.0398           | 0.0598        |                  |  |
| Tukey's multiple comparisons test | Mean Diff. | 95.00% CI of diff. | Below threshold? | Summary       | Adjusted P Value |  |
| DMSO control vs. Alpelisib        | 0.9779     | 0.4810 to 1.475    | Yes              | **            | 0.001            |  |
| DMSO control vs. Rapamycin 1uM    | 0.5195     | 0.02253 to 1.016   | Yes              | *             | 0.0408           |  |
| DMSO control vs. Rapamycin 20nM   | 0.3865     | -0.1104 to 0.8834  | No               | ns            | 0.1361           |  |
| Alpelisib vs. Rapamycin 1uM       | -0.4585    | -0.9554 to 0.03843 | No               | ns            | 0.0709           |  |
| Alpelisib vs. Rapamycin 20nM      | -0.5914    | -1.088 to -0.09451 | Yes              | *             | 0.0215           |  |
| Rapamycin 1uM vs. Rapamycin 20nM  | -0.1329    | -0.6299 to 0.3640  | No               | ns            | 0.8264           |  |

Fig 5F- pAKT473

|                                   | DMSO       | Alpelisib           | 20nM Rapamycin   | 1uM Rapamycin |                  |
|-----------------------------------|------------|---------------------|------------------|---------------|------------------|
|                                   | 0.744361   | 0.022532            | 0.467843         | 0.349861      |                  |
|                                   | 1.23111    | 0.007306            | 0.446464         | 0.304004      |                  |
|                                   | 1.024528   | 0.012636            | 0.374178         | 0.308437      |                  |
| MEAN                              | 0.99999667 | 0.014158            | 0.429495         | 0.320767333   |                  |
| SEM                               | 0.1410     | 0.0045              | 0.0283           | 0.0146        |                  |
| Tukey's multiple comparisons test | Mean Diff. | 95.00% CI of diff.  | Below threshold? | Summary       | Adjusted P Value |
| DMSO control vs. Alpelisib        | 0.9858     | 0.6582 to 1.313     | Yes              | ****          | <0.0001          |
| DMSO control vs. Rapamycin 1uM    | 0.6792     | 0.3516 to 1.007     | Yes              | ***           | 0.0007           |
| DMSO control vs. Rapamycin 20nM   | 0.5705     | 0.2429 to 0.8981    | Yes              | **            | 0.0023           |
| Alpelisib vs. Rapamycin 1uM       | -0.3066    | -0.6342 to 0.02099  | No               | ns            | 0.0668           |
| Alpelisib vs. Rapamycin 20nM      | -0.4153    | -0.7429 to -0.08774 | Yes              | *             | 0.0154           |
| Rapamycin 1uM vs. Rapamycin 20nM  | -0.1087    | -0.4363 to 0.2189   | No               | ns            | 0.7199           |

Fig 5F- pS6K1

|                                   | DMSO       | Alpelisib          | 20nM Rapamycin   | 1uM Rapamycin |                  |
|-----------------------------------|------------|--------------------|------------------|---------------|------------------|
|                                   | 1.513157   | 0.281381           | 0.100334         | 0.131519      |                  |
|                                   | 1.017351   | 0.421832           | 0.060366         | 0.078915      |                  |
|                                   | 0.469492   | 0.281487           | 0.018947         | 0.041505      |                  |
| MEAN                              | 1          | 0.328233333        | 0.059882333      | 0.083979667   |                  |
| SEM                               | 0.3014     | 0.0468             | 0.0235           | 0.0261        |                  |
| Tukey's multiple comparisons test | Mean Diff. | 95.00% CI of diff. | Below threshold? | Summary       | Adjusted P Value |
| DMSO control vs. Alpelisib        | 0.6718     | -0.02348 to 1.367  | No               | ns            | 0.0582           |
| DMSO control vs. Rapamycin 1uM    | 0.916      | 0.2208 to 1.611    | Yes              | *             | 0.0124           |
| DMSO control vs. Rapamycin 20nM   | 0.9401     | 0.2449 to 1.635    | Yes              | *             | 0.0108           |
| Alpelisib vs. Rapamycin 1uM       | 0.2443     | -0.4510 to 0.9395  | No               | ns            | 0.6855           |
| Alpelisib vs. Rapamycin 20nM      | 0.2684     | -0.4269 to 0.9636  | No               | ns            | 0.6234           |
| Rapamycin 1uM vs. Rapamycin 20nM  | 0.0241     | -0.6711 to 0.7193  | No               | ns            | 0.9995           |

Fig 5F- pERK

|                                   | DMSO       | Alpelisib           | 20nM Rapamycin   | 1uM Rapamycin |                  |
|-----------------------------------|------------|---------------------|------------------|---------------|------------------|
|                                   | 1.094149   | 0.784358            | 1.647677         | 1.390611      |                  |
|                                   | 1.111776   | 0.741303            | 1.70151          | 1.469345      |                  |
|                                   | 0.794074   | 0.650274            | 1.752832         | 1.243659      |                  |
| MEAN                              | 0.99999667 | 0.725311667         | 1.700673         | 1.367871667   |                  |
| SEM                               | 0.1031     | 0.0395              | 0.0304           | 0.0661        |                  |
| Tukey's multiple comparisons test | Mean Diff. | 95.00% CI of diff.  | Below threshold? | Summary       | Adjusted P Value |
| DMSO control vs. Alpelisib        | 0.2747     | -0.02473 to 0.5741  | No               | ns            | 0.0726           |
| DMSO control vs. Rapamycin 1uM    | -0.3679    | -0.6673 to -0.06845 | Yes              | *             | 0.0182           |
| DMSO control vs. Rapamycin 20nM   | -0.7007    | -1.000 to -0.4013   | Yes              | ***           | 0.0003           |
| Alpelisib vs. Rapamycin 1uM       | -0.6426    | -0.9420 to -0.3431  | Yes              | ***           | 0.0006           |
| Alpelisib vs. Rapamycin 20nM      | -0.9754    | -1.275 to -0.6759   | Yes              | ****          | <0.0001          |
| Rapamycin 1uM vs. Rapamycin 20nM  | -0.3328    | -0.6322 to -0.03338 | Yes              | *             | 0.0304           |

Figure 6c (pAKT308)

|                                   | DMSO       | Trametinib         | Torkinib         |         |                  |
|-----------------------------------|------------|--------------------|------------------|---------|------------------|
|                                   | 0.93727    | 0.78084            | 0.306226         |         |                  |
|                                   | 1.1537     | 0.702136           | 0.315915         |         |                  |
|                                   | 0.909029   | 0.672963           | 0.280022         |         |                  |
| MEAN                              | 0.99999667 | 0.718646333        | 0.300721         |         |                  |
| SEM                               | 0.0773     | 0.0322             | 0.0107           |         |                  |
| Tukey's multiple comparisons test | Mean Diff. | 95.00% CI of diff. | Below threshold? | Summary | Adjusted P Value |
| DMSO vs. Trametinib               | 0.2814     | 0.06988 to 0.4928  | Yes              | *       | 0.0153           |
| DMSO vs. Torkinib                 | 0.6993     | 0.4878 to 0.9107   | Yes              | ***     | 0.0001           |
| Trametinib vs. Torkinib           | 0.4179     | 0.2065 to 0.6294   | Yes              | **      | 0.0022           |

Figure 6d (pAKT473)

|                                   | DMSO       | Trametinib          | Torkinib         |         |                  |
|-----------------------------------|------------|---------------------|------------------|---------|------------------|
|                                   | 1.094114   | 1.118049            | 0.19541          |         |                  |
|                                   | 0.946319   | 1.240642            | 0.141743         |         |                  |
|                                   | 0.959566   | 1.288045            | 0.15493          |         |                  |
| MEAN                              | 0.99999667 | 1.215578667         | 0.164027667      |         |                  |
| SEM                               | 0.0472     | 0.0506              | 0.0161           |         |                  |
| Tukey's multiple comparisons test | Mean Diff. | 95.00% CI of diff.  | Below threshold? | Summary | Adjusted P Value |
| DMSO vs. Trametinib               | -0.2156    | -0.3937 to -0.03746 | Yes              | *       | 0.0232           |
| DMSO vs. Torkinib                 | 0.836      | 0.6579 to 1.014     | Yes              | ****    | <0.0001          |
| Trametinib vs. Torkinib           | 1.052      | 0.8734 to 1.230     | Yes              | ****    | <0.0001          |



Figure 6e (pS6K1)

|                                   | DMSO       | Trametinib         | Torkinib         |         |                  |
|-----------------------------------|------------|--------------------|------------------|---------|------------------|
|                                   | 1.084068   | 1.284746           | 0.061605         |         |                  |
|                                   | 0.972289   | 0.840975           | 0.074794         |         |                  |
|                                   | 0.943643   | 0.576969           | 0.114293         |         |                  |
| MEAN                              | 1          | 0.900896667        | 0.083564         |         |                  |
| SEM                               | 0.0428     | 0.2065             | 0.0158           |         |                  |
| Tukey's multiple comparisons test | Mean Diff. | 95.00% CI of diff. | Below threshold? | Summary | Adjusted P Value |
| DMSO vs. Trametinib               | 0.0991     | -0.4307 to 0.6289  | No               | ns      | 0.8385           |
| DMSO vs. Torkinib                 | 0.9164     | 0.3866 to 1.446    | Yes              | **      | 0.0044           |
| Trametinib vs. Torkinib           | 0.8173     | 0.2875 to 1.347    | Yes              | **      | 0.0077           |

Figure 6f (pERK)

|                                   | DMSO       | Trametinib         | Torkinib         |         |                  |
|-----------------------------------|------------|--------------------|------------------|---------|------------------|
|                                   | 0.891142   | 0.073555           | 1.256429         |         |                  |
|                                   | 0.986796   | 0.026483           | 1.118652         |         |                  |
|                                   | 1.122062   | 0.039341           | 1.154616         |         |                  |
| MEAN                              | 1          | 0.046459667        | 1.176565667      |         |                  |
| SEM                               | 0.0670     | 0.0140             | 0.0413           |         |                  |
| Tukey's multiple comparisons test | Mean Diff. | 95.00% CI of diff. | Below threshold? | Summary | Adjusted P Value |
| DMSO vs. Trametinib               | 0.9535     | 0.7533 to 1.154    | Yes              | ****    | <0.0001          |
| DMSO vs. Torkinib                 | -0.1766    | -0.3768 to 0.02365 | No               | ns      | 0.0786           |
| Trametinib vs. Torkinib           | -1.13      | -1.330 to -0.9299  | Yes              | ****    | <0.0001          |

Figure 6g (Volume of Fibrin Void Spaces)

|                                   | PIK3CAE542K   | 1uM Trametinib        | Torkinib 5uM     |         |                  |
|-----------------------------------|---------------|-----------------------|------------------|---------|------------------|
|                                   | 114000000     | 8052925.491           | 2041528          |         |                  |
|                                   | 60849879      | 5698440.969           | 3180299          |         |                  |
|                                   | 53909663      | 6640777.851           | 1631008          |         |                  |
| MEAN                              | 76253180.67   | 6797381.437           | 2284278.333      |         |                  |
| SEM                               | 18979448.7703 | 684176.5984           | 463418.9767      |         |                  |
| Tukey's multiple comparisons test | Mean Diff.    | 95.00% CI of diff.    | Below threshold? | Summary | Adjusted P Value |
| PIK3CAE542K vs. Trametinib        | 69455799      | 21862761 to 117048838 | Yes              | **      | 0.01             |
| PIK3CAE542K vs. Torkinib          | 73968902      | 26375864 to 121561941 | Yes              | **      | 0.0074           |
| Trametinib vs. Torkinib           | 4513103       | -43079935 to 52106141 | No               | ns      | 0.9548           |

Figure 6h (Branch Points)

|                                   | GFP control | Trametinib         | Torkinib         |         |                  |
|-----------------------------------|-------------|--------------------|------------------|---------|------------------|
|                                   | 265         | 1180               | 424              |         |                  |
|                                   | 219         | 656                | 286              |         |                  |
|                                   | 248         | 716                | 454              |         |                  |
| MEAN                              | 244         | 850.6666667        | 388              |         |                  |
| SEM                               | 13.4288     | 165.5751           | 51.7301          |         |                  |
| Tukey's multiple comparisons test | Mean Diff.  | 95.00% CI of diff. | Below threshold? | Summary | Adjusted P Value |
| GFP control vs. Trametinib        | -606.7      | -1043 to -170.8    | Yes              | *       | 0.0124           |
| GFP control vs. Torkinib          | -144        | -579.9 to 291.9    | No               | ns      | 0.5958           |
| Trametinib vs. Torkinib           | 462.7       | 26.79 to 898.5     | Yes              | *       | 0.0397           |

Figure 7b (pAKT308)

|      | GFP control | PIK3CA-E542K | Unpaired t test                     |               |
|------|-------------|--------------|-------------------------------------|---------------|
|      | 0.630034    | 10.2811      | P value                             | <0.0001       |
|      | 1.150537    | 10.67841     | P value summary                     | ****          |
|      | 1.21943     | 9.747855     | Significantly different (P < 0.05)? | Yes           |
|      |             |              | One- or two-tailed P value?         | Two-tailed    |
| MEAN | 1.00000333  | 10.23578833  | t, df                               | t=28.20, df=4 |
| SEM  | 0.1860      | 0.2696       |                                     |               |

Figure 7c (pERK)

|      | GFP control | PIK3CA-E542K | Unpaired t test                     |               |
|------|-------------|--------------|-------------------------------------|---------------|
|      | 1.052544    | 1.841221     | P value                             | 0.0488        |
|      | 0.961367    | 1.825541     | P value summary                     | *             |
|      | 0.986088    | 1.179302     | Significantly different (P < 0.05)? | Yes           |
|      |             |              | One- or two-tailed P value?         | Two-tailed    |
| MEAN | 0.99999667  | 1.615354667  | t, df                               | t=2.800, df=4 |
| SEM  | 0.0272      | 0.2181       |                                     |               |

Figure 7d (RAC-GTP)

|      | GFP       | PIK3CA-E542K | Unpaired t test                     |               |
|------|-----------|--------------|-------------------------------------|---------------|
|      | 0.60667   | 1.699003     | P value                             | 0.0301        |
|      | 1.183801  | 1.325983     | P value summary                     | *             |
|      | 1.234135  | 3.001577     | Significantly different (P < 0.05)? | Yes           |
|      | 1.29477   | 5.229291     | One- or two-tailed P value?         | Two-tailed    |
|      | 0.680622  | 2.944057     | t, df                               | t=2.632, df=8 |
| MEAN | 0.9999996 | 2.8399822    |                                     |               |
| SEM  | 0.1470    | 0.6834       |                                     |               |

Figure 7g (mean migration speed)

| GFP mean speed | PIK3CA E542K mean speed | Unpaired t test                     |                 |
|----------------|-------------------------|-------------------------------------|-----------------|
| 1.242936       | 1.48446                 | P value                             | 0.7103          |
| 1.125377       | 1.112777                | P value summary                     | ns              |
| 0.926782       | 1.658168                | Significantly different (P < 0.05)? | No              |
| 2.389489       | 1.549585                | One- or two-tailed P value?         | Two-tailed      |
| 0.782585       | 2.334734                | t, df                               | t=0.3727, df=91 |
| 2.270996       | 1.22956                 |                                     |                 |
| 3.688812       | 1.935047                |                                     |                 |
| 0.96708        | 0.883674                |                                     |                 |
| 0.961223       | 2.078204                |                                     |                 |
| 0.662913       | 2.32318                 |                                     |                 |
| 1.295655       | 1.384731                |                                     |                 |
| 0.916822       | 1.15261                 |                                     |                 |
| 1.310455       | 1.010856                |                                     |                 |
| 1.32088        | 1.263663                |                                     |                 |
| 1.413815       | 2.505858                |                                     |                 |
| 1.977788       | 1.862949                |                                     |                 |
| 1.429767       | 1.463424                |                                     |                 |
| 0.893329       | 1.40869                 |                                     |                 |
| 1.570513       | 0.908823                |                                     |                 |
| 2.228927       | 1.672161                |                                     |                 |
| 1.691282       | 2.167745                |                                     |                 |
| 2.322872       | 0.904641                |                                     |                 |
| 2.221058       | 2.166066                |                                     |                 |
| 1.398399       | 1.536984                |                                     |                 |
| 1.940702       | 1.356907                |                                     |                 |
| 1.327047       | 3.458967                |                                     |                 |
| 1.246191       | 1.7357                  |                                     |                 |
| 3.1556         | 2.050681                |                                     |                 |
| 3.353328       | 1.010879                |                                     |                 |
| 2.891264       | 2.11117                 |                                     |                 |
| 0.552032       | 1.142557                |                                     |                 |
| 1.916015       | 1.286928                |                                     |                 |
| 0.844874       | 1.915203                |                                     |                 |
|                | 1.40911                 |                                     |                 |
|                | 2.011025                |                                     |                 |
|                | 1.333424                |                                     |                 |
|                | 2.116627                |                                     |                 |
|                | 1.12967                 |                                     |                 |
|                | 2.353486                |                                     |                 |
|                | 1.593062                |                                     |                 |
|                | 1.952379                |                                     |                 |
|                | 2.964473                |                                     |                 |

|      |             |            |
|------|-------------|------------|
|      |             | 2.8407     |
|      |             | 1.462967   |
|      |             | 1.570143   |
|      |             | 2.006383   |
|      |             | 1.055159   |
|      |             | 2.512387   |
|      |             | 2.038298   |
|      |             | 1.521894   |
|      |             | 1.017206   |
|      |             | 1.22133    |
|      |             | 1.471854   |
|      |             | 2.58597    |
|      |             | 2.084611   |
|      |             | 1.170011   |
|      |             | 0.89518    |
|      |             | 2.314062   |
|      |             | 1.439992   |
|      |             | 1.671118   |
| MEAN | 1.643539636 | 1.69683505 |
| SEM  | 0.1395      | 0.0734     |

Figure 7J (Confinement Ratio)

| GFP      | PIK3CA-E542K | Unpaired t test                     |                 |
|----------|--------------|-------------------------------------|-----------------|
| 0.568537 | 0.026215     | P value                             | 0.0392          |
| 0.357595 | 0.192833     | P value summary                     | *               |
| 0.311344 | 0.146861     | Significantly different (P < 0.05)? | Yes             |
| 0.126196 | 0.103418     | One- or two-tailed P value?         | Two-tailed      |
| 0.263133 | 0.032904     | t, df                               | t=2.085, df=115 |
| 0.177417 | 0.362387     |                                     |                 |
| 0.09582  | 0.004014     |                                     |                 |
| 0.265363 | 0.273343     |                                     |                 |
| 0.050458 | 0.121916     |                                     |                 |
| 0.166129 | 0.148491     |                                     |                 |
| 0.587921 | 0.005269     |                                     |                 |
| 0.133802 | 0.230708     |                                     |                 |
| 0.126918 | 0.447934     |                                     |                 |
| 0.229205 | 0.087062     |                                     |                 |
| 0.390812 | 0.116264     |                                     |                 |
| 0.192136 | 0.063975     |                                     |                 |
| 0.454725 | 0.024115     |                                     |                 |
| 0.32133  | 0.059032     |                                     |                 |
| 0.198663 | 0.130742     |                                     |                 |
| 0.204053 | 0.151452     |                                     |                 |

|          |          |
|----------|----------|
| 0.421097 | 0.041902 |
| 0.041276 | 0.140625 |
| 0.02638  | 0.110253 |
| 0.403703 | 0.039212 |
| 0.174461 | 0.15203  |
| 0.04626  | 0.13095  |
| 0.364325 | 0.054651 |
| 0.29908  | 0.595514 |
| 0.087648 | 0.050255 |
| 0.323123 | 0.012497 |
| 0.266799 | 0.687332 |
| 0.30834  | 0.046062 |
| 0.416041 | 0.172866 |
| 0.020377 | 0.424647 |
| 0.271958 | 0.042572 |
| 0.07381  | 0.120679 |
| 0.133521 | 0.020377 |
| 0.007014 | 0.271958 |
| 0.028539 | 0.07381  |
| 0.160395 | 0.133521 |
| 0.204849 | 0.007014 |
| 0.209783 | 0.028539 |
| 0.124454 | 0.160395 |
| 0.209515 | 0.204849 |
| 0.044449 | 0.209783 |
| 0.177786 | 0.124454 |
| 0.45734  | 0.209515 |
| 0.17998  | 0.044449 |
| 0.171406 | 0.177786 |
| 0.293753 | 0.45734  |
| 0.13467  | 0.17998  |
| 0.11018  | 0.171406 |
| 0.474246 | 0.293753 |
| 0.144179 | 0.13467  |
| 0.059166 | 0.11018  |
| 0.413096 | 0.474246 |
| 0.529503 | 0.144179 |
|          | 0.059166 |
|          | 0.413096 |
|          | 0.529503 |

Figure 7J (Confinement Ratio)

| GFP      | PIK3CA-E542K | Unpaired t test |        |
|----------|--------------|-----------------|--------|
| 0.568537 | 0.026215     | P value         | 0.0392 |

|          |          |                                     |                    |
|----------|----------|-------------------------------------|--------------------|
| 0.357595 | 0.192833 | P value summary                     | *                  |
| 0.311344 | 0.146861 | Significantly different (P < 0.05)? | Yes                |
| 0.126196 | 0.103418 | One- or two-tailed P value?         | Two-tailed         |
| 0.263133 | 0.032904 | t, df                               | t=2.085,<br>df=115 |
| 0.177417 | 0.362387 |                                     |                    |
| 0.09582  | 0.004014 |                                     |                    |
| 0.265363 | 0.273343 |                                     |                    |
| 0.050458 | 0.121916 |                                     |                    |
| 0.166129 | 0.148491 |                                     |                    |
| 0.587921 | 0.005269 |                                     |                    |
| 0.133802 | 0.230708 |                                     |                    |
| 0.126918 | 0.447934 |                                     |                    |
| 0.229205 | 0.087062 |                                     |                    |
| 0.390812 | 0.116264 |                                     |                    |
| 0.192136 | 0.063975 |                                     |                    |
| 0.454725 | 0.024115 |                                     |                    |
| 0.32133  | 0.059032 |                                     |                    |
| 0.198663 | 0.130742 |                                     |                    |
| 0.204053 | 0.151452 |                                     |                    |
| 0.421097 | 0.041902 |                                     |                    |
| 0.041276 | 0.140625 |                                     |                    |
| 0.02638  | 0.110253 |                                     |                    |
| 0.403703 | 0.039212 |                                     |                    |
| 0.174461 | 0.15203  |                                     |                    |
| 0.04626  | 0.13095  |                                     |                    |
| 0.364325 | 0.054651 |                                     |                    |
| 0.29908  | 0.595514 |                                     |                    |
| 0.087648 | 0.050255 |                                     |                    |
| 0.323123 | 0.012497 |                                     |                    |
| 0.266799 | 0.687332 |                                     |                    |
| 0.30834  | 0.046062 |                                     |                    |
| 0.416041 | 0.172866 |                                     |                    |
| 0.020377 | 0.424647 |                                     |                    |
| 0.271958 | 0.042572 |                                     |                    |
| 0.07381  | 0.120679 |                                     |                    |
| 0.133521 | 0.020377 |                                     |                    |
| 0.007014 | 0.271958 |                                     |                    |
| 0.028539 | 0.07381  |                                     |                    |
| 0.160395 | 0.133521 |                                     |                    |
| 0.204849 | 0.007014 |                                     |                    |
| 0.209783 | 0.028539 |                                     |                    |
| 0.124454 | 0.160395 |                                     |                    |
| 0.209515 | 0.204849 |                                     |                    |
| 0.044449 | 0.209783 |                                     |                    |

|          |          |
|----------|----------|
| 0.177786 | 0.124454 |
| 0.45734  | 0.209515 |
| 0.17998  | 0.044449 |
| 0.171406 | 0.177786 |
| 0.293753 | 0.45734  |
| 0.13467  | 0.17998  |
| 0.11018  | 0.171406 |
| 0.474246 | 0.293753 |
| 0.144179 | 0.13467  |
| 0.059166 | 0.11018  |
| 0.413096 | 0.474246 |
| 0.529503 | 0.144179 |
|          | 0.059166 |
|          | 0.413096 |
|          | 0.529503 |

Supplemental Figure 1b (Area)

|                                   | GFP ctrl    | PIK3CA WT          | PIK3CA E542K     | PIK3CA E545K |                  |  |
|-----------------------------------|-------------|--------------------|------------------|--------------|------------------|--|
|                                   | 2535.532    | 2100.992           | 5807.604         | 5455.969     |                  |  |
|                                   | 3401.718    | 3640.492           | 5772.96          | 5298.083     |                  |  |
|                                   | 3673.089    | 3106.803           | 5428.105666      | 4863.099     |                  |  |
| MEAN                              | 3203.446333 | 2949.429           | 5669.556555      | 5205.717     |                  |  |
| SEM                               | 343.0222    | 451.3277           | 121.1390         | 177.2685     |                  |  |
| Tukey's multiple comparisons test | Mean Diff.  | 95.00% CI of diff. | Below threshold? | Summary      | Adjusted P Value |  |
| GFP ctrl vs. PIK3CA WT            | 254         | -1119 to 1627      | No               | ns           | 0.9315           |  |
| GFP ctrl vs. PIK3CA E542K         | -2466       | -3839 to -1093     | Yes              | **           | 0.0019           |  |
| GFP ctrl vs. PIK3CA E545K         | -2002       | 629.6              | Yes              | **           | 0.007            |  |
| PIK3CA WT vs. PIK3CA E542K        | -2720       | -4093 to -1347     | Yes              | **           | 0.001            |  |
| PIK3CA WT vs. PIK3CA E545K        | -2256       | 883.6              | Yes              | **           | 0.0034           |  |
| PIK3CA E542K vs. PIK3CA E545K     | 463.8       | -908.8 to 1836     | No               | ns           | 0.7093           |  |

Supplemental Figure 1b (Relative Junction Area)

|                                     | GFP         | PIK3CA-WT          | PIK3CA-E542K     | PIK3CA-E545K |                  |  |
|-------------------------------------|-------------|--------------------|------------------|--------------|------------------|--|
|                                     | 0.89699289  | 1.1272245          | 0.39640067       | 0.17647663   |                  |  |
|                                     | 0.98337379  | 0.99350516         | 0.78497523       | 0.21741322   |                  |  |
|                                     | 1.11963331  | 1.03977173         | 0.77770708       | 0.38753206   |                  |  |
| MEAN                                | 0.999999997 | 1.053500463        | 0.65302766       | 0.26047397   |                  |  |
| SEM                                 | 0.0648      | 0.0392             | 0.1283           | 0.0646       |                  |  |
| Dunnett's multiple comparisons test | Mean Diff.  | 95.00% CI of diff. | Below threshold? | Summary      | Adjusted P Value |  |
| GFP vs. PIK3CA-WT                   | -0.0535     | -0.3842 to 0.2772  | No               | ns           | 0.9357           |  |
| GFP vs. PIK3CA-E542K                | 0.347       | 0.01623 to 0.6777  | Yes              | *            | 0.0406           |  |
| GFP vs. PIK3CA-E545K                | 0.7395      | 0.4088 to 1.070    | Yes              | ***          | 0.0005           |  |

Supplemental Figure 1b (Relative Cortical Actin)

|  | GFP   | PIK3CA-WT | PIK3CA-E542K | PIK3CA-E545K |
|--|-------|-----------|--------------|--------------|
|  | 0.962 | 1.12      | 0.322        | 0.412        |
|  | 0.922 | 1.13      | 0.475        | 0.447        |

|                                     |             |                    |                  |         |                  |
|-------------------------------------|-------------|--------------------|------------------|---------|------------------|
|                                     | 1.12        | 0.483              | 0.357            | 0.308   |                  |
| MEAN                                | 1.001333333 | 0.911              | 0.384666667      | 0.389   |                  |
| SEM                                 | 0.0604      | 0.2140             | 0.0463           | 0.0417  |                  |
| Dunnett's multiple comparisons test | Mean Diff.  | 95.00% CI of diff. | Below threshold? | Summary | Adjusted P Value |
| GFP vs. PIK3CA-WT                   | 0.09033     | -0.3800 to 0.5606  | No               | ns      | 0.9004           |
| GFP vs. PIK3CA-E542K                | 0.6167      | 0.1464 to 1.087    | Yes              | *       | 0.0137           |
| GFP vs. PIK3CA-E545K                | 0.6123      | 0.1420 to 1.083    | Yes              | *       | 0.0142           |

Supplemental Figure 1b (Relative Stress Fibers)

|                                     |             |                    |                  |              |                  |
|-------------------------------------|-------------|--------------------|------------------|--------------|------------------|
|                                     | GFP         | PIK3CA-WT          | PIK3CA-E542K     | PIK3CA-E545K |                  |
|                                     | 1.34        | 0.95               | 1.41             | 3.74         |                  |
|                                     | 0.812       | 1.06               | 1.33             | 3.5          |                  |
|                                     | 0.847       | 1.17               | 1.57             | 1.98         |                  |
| MEAN                                | 0.999666667 | 1.06               | 1.436666667      | 3.073333333  |                  |
| SEM                                 | 0.1705      | 0.0635             | 0.0706           | 0.5510       |                  |
| Dunnett's multiple comparisons test | Mean Diff.  | 95.00% CI of diff. | Below threshold? | Summary      | Adjusted P Value |
| GFP vs. PIK3CA-WT                   | -0.06033    | -1.251 to 1.130    | No               | ns           | 0.9976           |
| GFP vs. PIK3CA-E542K                | -0.437      | -1.627 to 0.7533   | No               | ns           | 0.6081           |
| GFP vs. PIK3CA-E545K                | -2.074      | -3.264 to -0.8833  | Yes              | **           | 0.0027           |

Supplemental Figure 2a (Transduction Efficiency)

|                                   |             |                    |                  |              |                  |
|-----------------------------------|-------------|--------------------|------------------|--------------|------------------|
|                                   | GFP ctrl    | PIK3CA WT          | PIK3CA E542K     | PIK3CA E545K |                  |
|                                   | 50.41171    | 94.3808            | 76.52157         | 84.24749     |                  |
|                                   | 56.61351    | 95.51409           | 74.62687         | 65.29764     |                  |
|                                   | 44.13427    | 95.69614           | 78.0345          | 77.87796     |                  |
| MEAN                              | 50.38649667 | 95.19701           | 76.39431333      | 75.80769667  |                  |
| SEM                               | 3.6025      | 0.4115             | 0.9858           | 5.5674       |                  |
| Tukey's multiple comparisons test | Mean Diff.  | 95.00% CI of diff. | Below threshold? | Summary      | Adjusted P Value |
| GFP ctrl vs. PIK3CA WT            | -44.81      | -60.02 to -29.60   | Yes              | ****         | <0.0001          |
| GFP ctrl vs. PIK3CA E542K         | -26.01      | -41.22 to -10.80   | Yes              | **           | 0.0026           |
| GFP ctrl vs. PIK3CA E545K         | -25.42      | -40.63 to -10.21   | Yes              | **           | 0.003            |
| PIK3CA WT vs. PIK3CA E542K        | 18.8        | 3.593 to 34.01     | Yes              | *            | 0.0176           |
| PIK3CA WT vs. PIK3CA E545K        | 19.39       | 4.180 to 34.60     | Yes              | *            | 0.0149           |
| PIK3CA E542K vs. PIK3CA E545K     | 0.5866      | -14.62 to 15.80    | No               | ns           | 0.9993           |

Supplemental Figure 2b (Percent beta-gal positive cells)

|                                   |             |                    |                  |              |                  |
|-----------------------------------|-------------|--------------------|------------------|--------------|------------------|
|                                   | GFP         | PIK3CA-WT          | PIK3CA-E542K     | PIK3CA-E545K |                  |
|                                   | 3.683709    | 2.1398             | 5.661006         | 3.139717     |                  |
|                                   | 19.46903    | 16.49175           | 16.69516         | 15.2712      |                  |
|                                   | 4.811715    | 3.811944           | 16.91919         | 16.43836     |                  |
| MEAN                              | 9.321484667 | 7.481164667        | 13.09178533      | 11.61642567  |                  |
| SEM                               | 5.0842      | 4.5311             | 3.7160           | 4.2517       |                  |
| Tukey's multiple comparisons test | Mean Diff.  | 95.00% CI of diff. | Below threshold? | Summary      | Adjusted P Value |
| GFP vs. PIK3CA-WT                 | 1.84        | -18.19 to 21.87    | No               | ns           | 0.9905           |
| GFP vs. PIK3CA-E542K              | -3.77       | -23.80 to 16.26    | No               | ns           | 0.9284           |
| GFP vs. PIK3CA-E545K              | -2.295      | -22.33 to 17.74    | No               | ns           | 0.9819           |
| PIK3CA-WT vs. PIK3CA-E542K        | -5.611      | -25.64 to 14.42    | No               | ns           | 0.8069           |
| PIK3CA-WT vs. PIK3CA-E545K        | -4.135      | -24.17 to 15.90    | No               | ns           | 0.9087           |
| PIK3CA-E542K vs. PIK3CA-E545K     | 1.475       | -18.56 to 21.51    | No               | ns           | 0.995            |



Supplemental Figure 3b (% Edu positive cells)

|                                   | GFP        | PIK3CA-WT          | PIK3CA-E542K     | PIK3CA-E545K |                  |
|-----------------------------------|------------|--------------------|------------------|--------------|------------------|
|                                   | 5.026569   | 3.435865           | 12.53577         | 9.539437     |                  |
|                                   | 3.70043    | 6.911527           | 13.52887         | 9.247234     |                  |
|                                   | 4.013955   | 2.804286           | 10.46617         | 8.552941     |                  |
|                                   | 4.788719   | 3.860612           | 9.596448         | 9.062098     |                  |
| MEAN                              | 4.38241825 | 4.2530725          | 11.5318145       | 9.1004275    |                  |
| SEM                               | 0.3137     | 0.9123             | 0.9073           | 0.2073       |                  |
| Tukey's multiple comparisons test | Mean Diff. | 95.00% CI of diff. | Below threshold? | Summary      | Adjusted P Value |
| GFP vs. PIK3CA-WT                 | 0.1293     | -2.685 to 2.943    | No               | ns           | 0.999            |
| GFP vs. PIK3CA-E542K              | -7.149     | -9.963 to -4.335   | Yes              | ****         | <0.0001          |
| GFP vs. PIK3CA-E545K              | -4.718     | -7.532 to -1.904   | Yes              | **           | 0.0016           |
| PIK3CA-WT vs. PIK3CA-E542K        | -7.279     | -10.09 to -4.465   | Yes              | ****         | <0.0001          |
| PIK3CA-WT vs. PIK3CA-E545K        | -4.847     | -7.661 to -2.033   | Yes              | **           | 0.0013           |
| PIK3CA-E542K vs. PIK3CA-E545K     | 2.431      | -0.3827 to 5.245   | No               | ns           | 0.0992           |

Supplemental Figure 4 (% Fibrin negative area micron<sup>2</sup>)

|                                   | GFP 24hr   | PIK3CA 24hr                           | GFP 48hr         | PIK3CA 48jr | GFP 72hr         | PIK3CA 72hr |
|-----------------------------------|------------|---------------------------------------|------------------|-------------|------------------|-------------|
|                                   | 1.256      | 1.653                                 | 1.626            | 10.969      | 1.798            | 13.312      |
|                                   | 0.683      | 5.518                                 | 1.25             | 14.681      | 1.29             | 19.281      |
|                                   | 0.347      | 0.734                                 | 2.959            | 7.142       | 0.505            | 13.922      |
|                                   |            | 4.78                                  |                  | 15.597      |                  | 20.748      |
|                                   |            | 6.941                                 |                  | 9.69        |                  | 23.875      |
|                                   |            | 5.704                                 |                  | 9.726       |                  | 21.237      |
| Mean                              | 0.762      | 4.221666667                           | 1.945            | 11.30083333 | 1.197666667      | 18.72916667 |
| SEM                               | 0.2654     | 1.0058                                | 0.5185           | 1.3212      | 0.3761           | 1.7282      |
| Tukey's multiple comparisons test | Mean Diff. | 95.00% CI of diff.                    | Below threshold? | Summary     | Adjusted P Value |             |
| GFP 24hr vs. PIK3CA 24hr          | -3.46      | 2.930 to -9.849 to -8.561 to          | No               | ns          | 0.5502           |             |
| GFP 24hr vs. GFP 48hr             | -1.183     | 6.195 to -16.93 to -4.149             | No               | ns          | 0.9956           |             |
| GFP 24hr vs. PIK3CA 48jr          | -10.54     | -7.814 to -7.814 to                   | Yes              | ***         | 0.0005           |             |
| GFP 24hr vs. GFP 72hr             | -0.4357    | 6.942 to -24.36 to -11.58             | No               | ns          | >0.9999          |             |
| GFP 24hr vs. PIK3CA 72hr          | -17.97     | -4.113 to -4.113 to                   | Yes              | ****        | <0.0001          |             |
| PIK3CA 24hr vs. GFP 48hr          | 2.277      | 8.666 to -12.30 to -12.30 to          | No               | ns          | 0.8699           |             |
| PIK3CA 24hr vs. PIK3CA 48jr       | -7.079     | 1.862 to -3.366 to -3.366 to          | Yes              | **          | 0.0042           |             |
| PIK3CA 24hr vs. GFP 72hr          | 3.024      | 9.414 to -19.72 to -9.290             | No               | ns          | 0.6795           |             |
| PIK3CA 24hr vs. PIK3CA 72hr       | -14.51     | 9.290 to -15.75 to -15.75 to          | Yes              | ****        | <0.0001          |             |
| GFP 48hr vs. PIK3CA 48jr          | -9.356     | 2.966 to -6.631 to -6.631 to          | Yes              | **          | 0.002            |             |
| GFP 48hr vs. GFP 72hr             | 0.7473     | 8.125 to -23.17 to -23.17 to          | No               | ns          | 0.9995           |             |
| GFP 48hr vs. PIK3CA 72hr          | -16.78     | 10.39 to 10.39 to                     | Yes              | ****        | <0.0001          |             |
| PIK3CA 48jr vs. GFP 72hr          | 10.1       | 3.714 to 16.49 to -12.65 to -12.65 to | Yes              | ***         | 0.0008           |             |
| PIK3CA 48jr vs. PIK3CA 72hr       | -7.428     | 2.211 to -23.92 to -23.92 to          | Yes              | **          | 0.0026           |             |
| GFP 72hr vs. PIK3CA 72hr          | -17.53     | 11.14 to 11.14 to                     | Yes              | ****        | <0.0001          |             |

Supplemental Figure 5

|             | ADAM8   | ADAM9    | ADAMTS 1 | ADAMTS1 3 | Cathepsin A | Cathepsin B | Cathepsin C | Cathepsin D | Cathepsin E | Cathepsin L | Cathepsin S | Cathepsin V | Cathepsin X/Z/P | DDPIV/CD26 | Kallikrein 3/PSA | Kallikrein 5 | Kallikrein 6 |
|-------------|---------|----------|----------|-----------|-------------|-------------|-------------|-------------|-------------|-------------|-------------|-------------|-----------------|------------|------------------|--------------|--------------|
| GFP         | 265.84  | 692.83   | 2254.74  | 211.765   | 2930.165    | 11080.95    | 925.675     | 7500.94     | 71.28       | 269.475     | 991.46      | 915.345     | 5267.835        | 759.79     | 151.375          | 19.355       | -27.98       |
| PIK3CAE542K | 365.35  | 1029.25  | 6010.12  | 260.955   | 2948.825    | 10364.1     | 1659.64     | 6656.4      | 153.075     | 386.125     | 557.065     | 948.84      | 6145.165        | 1005.02    | 465.205          | 515.145      | 816.425      |
| Alpelisib   | 335.095 | 1250.22  | 4430.1   | 228.375   | 4949.86     | 13027.59    | 1577.52     | 8722.135    | 119.785     | 452.995     | 780.48      | 1042.34     | 7971.46         | 931.635    | 333.895          | 391.405      | 136.095      |
| Rapamycin   | 425.585 | 1248.87  | 8079.28  | 307.335   | 3051.035    | 9734.87     | 1409.37     | 6543.05     | 186.37      | 522.305     | 646.63      | 1171.07     | 5888.755        | 893.275    | 332.7            | 313.025      | 746.29       |
| Trametinib  | 480.81  | 1473.815 | 6438.3   | 307.525   | 3260.13     | 13016.51    | 1956.74     | 11056.135   | 306.38      | 846.735     | 829.395     | 1652.15     | 6548.18         | 896.745    | 450.35           | 551.34       | 624.315      |
| Torkinib    | 521.626 | 844.528  | 3008.373 | 272.048   | 1682.284    | 6006.625    | 956.783     | 4479.924    | 272.142     | 451.069     | 619.094     | 910.238     | 3189.448        | 643.974    | 266.186          | 421.077      | 289.039      |
| PAKi        | 406.315 | 1105.52  | 8400.465 | 246.615   | 2314.825    | 10124.13    | 1684.555    | 6655.59     | 248.775     | 753.06      | 890.005     | 1357.085    | 5009.95         | 815.75     | 347.58           | 407.205      | 1028.84      |

  

|             | Kallikrein 7 | Kallikrein 10 | Kallikrein 11 | Kallikrein 13 | MMP-1    | MMP-2    | MMP-3   | MMP-7    | MMP-8    | MMP-9   | MMP-10   | MMP-12   | MMP-13  | Nephrylysin/CD10 | Presenilin | Proprotein Convertase 9 | Proteinase 3 | uPA/Urokinase |
|-------------|--------------|---------------|---------------|---------------|----------|----------|---------|----------|----------|---------|----------|----------|---------|------------------|------------|-------------------------|--------------|---------------|
| GFP         | 72.76        | 351.2         | 146.91        | 578.34        | 11289.37 | 7024.955 | 102.925 | 521.45   | 971.68   | 58.975  | 1677.2   | 1084.69  | 574.395 | 288.415          | -119.85    | -78.615                 | -94.01       | 3048.39       |
| PIK3CAE542K | 169.96       | 351.28        | 159.82        | 909.675       | 14745.21 | 6804.395 | 495.27  | 611.385  | 1023.45  | 174.265 | 417.105  | 1614.035 | 754.37  | 636.8            | 257.44     | 17.54                   | -6.05        | 7972.335      |
| Alpelisib   | 75.85        | 406.545       | 50.16         | 737.435       | 14273.98 | 7201.145 | 410.275 | 498.3    | 961.23   | 100.75  | 1110.425 | 1469.53  | 657.625 | 416.63           | 197.745    | -52.455                 | -41.785      | 4344.54       |
| Rapamycin   | 253.15       | 505.46        | 179.985       | 671.635       | 13049.38 | 7211.165 | 333.06  | 596.02   | 1132.665 | 264.745 | 596.055  | 1248.535 | 704.87  | 445.695          | 89.5       | 89.575                  | 139.305      | 8036.72       |
| Trametinib  | 365.745      | 767.46        | 166.55        | 695.275       | 16942.8  | 13802.07 | 664.3   | 1624.695 | 2032.09  | 413.615 | 779.765  | 1779.785 | 773.4   | 520.025          | 366.225    | 262.775                 | 212.56       | 8623.865      |
| Torkinib    | 373.375      | 597.367       | 207.057       | 736.619       | 11922.75 | 3355.591 | 414.649 | 960.211  | 1020.259 | 283.779 | 334.332  | 1336.097 | 640.314 | 396.242          | 232.954    | 174.444                 | 202.016      | 4153.958      |
| PAKi        | 377.595      | 538.815       | 156.745       | 582.495       | 14384.53 | 6929.33  | 489.525 | 1225.825 | 1561.895 | 251.795 | 597.665  | 1764.335 | 745.58  | 359.8            | 354.54     | 258.525                 | 174.475      | 7916.95       |

Supplemental Figure 6b (PIK3CA-E542K + HLF coculture)

|                                     | HLF same channel | HLF separate channel |
|-------------------------------------|------------------|----------------------|
|                                     | 123000000        | 128000000            |
|                                     | 55349665         | 142000000            |
|                                     | 56502096         | 59787357             |
|                                     | 53972073         | 51188532             |
|                                     |                  | 95825764             |
|                                     |                  | 109000000            |
| Mean                                | 72205958.5       | 97633608.83          |
| SEM                                 | 16939242.3097    | 14846370.4528        |
| Unpaired t test                     |                  |                      |
| P value                             |                  | 0.2988               |
| P value summary                     | ns               |                      |
| Significantly different (P < 0.05)? | No               |                      |
| One- or two-tailed P value?         | Two-tailed       |                      |
| t, df                               | t=1.111, df=8    |                      |

Supplemental Figure 6b (GFP control in EGM2 vs PIK3CA-E542K in EBM2 media)

|                                     | EGM2 media    | EBM2 + 2% serum |
|-------------------------------------|---------------|-----------------|
|                                     | 128000000     | 13232837        |
|                                     | 142000000     | 23002289        |
|                                     | 59787357      | 16946956        |
|                                     | 51188532      | 18296500        |
|                                     | 95825764      |                 |
|                                     | 109000000     |                 |
| Mean                                | 97633608.83   | 17869645.5      |
| SEM                                 | 14846370.4528 | 2018200.1685    |
| Unpaired t test                     |               |                 |
| P value                             |               | 0.0027          |
| P value summary                     | **            |                 |
| Significantly different (P < 0.05)? | Yes           |                 |
| One- or two-tailed P value?         | Two-tailed    |                 |
| t, df                               | t=4.282, df=8 |                 |

Supplemental Figure 6b (PIK3CA-E542K in EGM2 vs EBM2 media)

|                                     | GFP           | PIK3CA-E542K |
|-------------------------------------|---------------|--------------|
|                                     | 5040986       | 13232837     |
|                                     | 7034815       | 18296500     |
|                                     | 10096187      | 23002289     |
|                                     | 5342216       | 16946956     |
| Mean                                | 6878551       | 17869645.5   |
| SEM                                 | 1158827.3609  | 2018200.1685 |
| Unpaired t test                     |               |              |
| P value                             |               | 0.0032       |
| P value summary                     | **            |              |
| Significantly different (P < 0.05)? | Yes           |              |
| One- or two-tailed P value?         | Two-tailed    |              |
| t, df                               | t=4.723, df=6 |              |

Supplemental Figure 8b (Percent viability)

| Dosage(micromolar) | BB94         |              |              | Alpelisib |          |              | Rapamycin    |              |              | Trametinib   |              |              | Torkinib     |              |              | PAKi         |              |              |
|--------------------|--------------|--------------|--------------|-----------|----------|--------------|--------------|--------------|--------------|--------------|--------------|--------------|--------------|--------------|--------------|--------------|--------------|--------------|
| 10                 | 99.6034<br>6 | 99.5759<br>6 | 99.8658<br>9 | 89.46679  | 90.91089 | 92.9866<br>1 | 98.7276<br>8 | 99.4854<br>8 | 99.3253<br>1 | 98.9948<br>8 | 99.4272<br>6 | 97.2549<br>7 | 94.7294<br>5 | 94.0668<br>6 | 92.6890<br>3 | 60.6269<br>3 | 87.2623<br>6 | 96.3414<br>3 |
| 5                  | 99.2909<br>5 | 99.6414<br>6 | 99.7638<br>8 | 92.73246  | 91.60176 | 95.7168<br>2 | 98.9048<br>3 | 99.6907<br>3 | 99.4825<br>4 | 98.8959<br>8 | 99.3961<br>5 | 99.7134<br>4 | 95.6172<br>4 | 94.1000<br>9 | 96.3154<br>5 | 91.9657<br>9 | 95.8498<br>7 | 98.4167<br>9 |
| 2.5                | 99.5147<br>1 | 99.7193<br>1 | 99.6833<br>3 | 96.98485  | 92.14842 | 97.1404<br>1 | 98.7655<br>1 | 99.2774<br>9 | 99.8086<br>7 | 98.5551<br>4 | 99.4637<br>6 | 99.8452<br>1 | 97.3780<br>3 | 97.4491<br>7 | 98.2411<br>2 | 98.0304<br>6 | 97.934<br>6  | 99.1818<br>7 |
| 1                  | 99.1546<br>9 | 99.6818<br>7 | 99.7774<br>3 | 98.59994  | 96.63822 | 98.7243<br>3 | 99.0093<br>2 | 99.538<br>7  | 99.7903<br>7 | 99.5415<br>5 | 99.3500<br>1 | 99.6381<br>1 | 98.3290<br>4 | 98.3259<br>2 | 99.7267<br>4 | 99.3941<br>4 | 99.0723<br>4 | 99.6990<br>3 |
| 0.5                | 99.4979<br>1 | 99.7616<br>5 | 94.9750<br>8 | 96.01594  | 98.16199 | 99.6062<br>9 | 99.5270<br>8 | 99.7982<br>8 | 99.7982<br>8 | 99.2804<br>8 | 99.4531<br>9 | 99.9147<br>3 | 98.5995<br>4 | 98.3973<br>9 | 99.3762<br>6 | 99.4158<br>4 | 99.2387<br>4 | 99.0063<br>8 |
| 0.25               | 99.6677<br>7 | 99.8090<br>6 | 99.6946<br>8 | 99.03571  | 98.98461 | 99.5270<br>2 | 98.9152<br>7 | 99.5137<br>8 | 99.8446<br>3 | 98.9467<br>8 | 99.6118<br>3 | 99.8835<br>7 | 98.8971<br>9 | 98.5257<br>8 | 99.7351<br>1 | 99.2032<br>6 | 99.4257<br>2 | 99.7090<br>6 |
| 0.1                | 99.7305<br>2 | 99.7831<br>8 | 99.6744<br>9 | 99.22951  | 98.09012 | 99.8711<br>7 | 98.4243<br>3 | 99.7110<br>6 | 99.7666<br>6 | 99.1333<br>8 | 99.6266<br>6 | 99.8665<br>5 | 99.1155<br>7 | 99.383<br>7  | 99.8538<br>7 | 99.1309<br>6 | 99.3972<br>5 | 98.4926<br>3 |
| 0.02               | 99.4374<br>1 | 99.5815<br>1 | 99.5111<br>4 | 99.26574  | 99.59444 | 99.9080<br>9 | 98.3962<br>3 | 99.8852<br>4 | 99.7746<br>1 | 74.5772<br>3 | 99.4353<br>1 | 99.8249<br>1 | 98.8971<br>8 | 99.5962<br>8 | 99.5597<br>8 | 99.1642<br>2 | 99.6378<br>7 | 99.9172<br>7 |
| 0.0003             | 99.3805<br>7 | 99.3784<br>5 | 99.7800<br>7 | 99.38057  | 99.37845 | 99.7800<br>7 | 99.3805<br>7 | 99.3784<br>5 | 99.7800<br>7 |

Supplemental Figure 8b (Percent Edu)

| BB94 ( $\mu\text{M}$ ) | N1       | N2       | N3       | P value (unpaired t-test) | P value summary |
|------------------------|----------|----------|----------|---------------------------|-----------------|
| 0                      | 4.436158 | 5.092271 | 5.234786 |                           |                 |
| 0.02                   | 5.407969 | 4.450784 | 2.923058 | 0.436223173               | ns              |
| 0.1                    | 3.79995  | 4.572987 | 2.44807  | 0.120509175               | ns              |
| 0.25                   | 3.214244 | 4.229979 | 2.279671 | 0.05225582                | ns              |
| 0.5                    | 1.585869 | 3.190997 | 1.622846 | 0.008782292               | **              |
| 1                      | 2.1      | 3.533962 | 1.850922 | 0.013824576               | *               |
| 2.5                    | 1.981755 | 2.551793 | 1.31582  | 0.00237452                | **              |
| 5                      | 3.703473 | 2.08306  | 1.438343 | 0.02482393                | *               |
| 10                     | 4.448685 | 4.042349 | 5.30245  | 0.508164272               | ns              |

| Alpelisib ( $\mu\text{M}$ ) | N1       | N2       | N3       | P value (unpaired t-test) | P value summary |
|-----------------------------|----------|----------|----------|---------------------------|-----------------|
| 0                           | 4.436158 | 5.092271 | 5.234786 |                           |                 |
| 0.02                        | 2.219518 | 0.045527 | 1.4396   | 0.005666482               | ***             |
| 0.1                         | 2.066953 | 0.050916 | 2.757144 | 0.017758281               | *               |
| 0.25                        | 2.744557 | 0.057945 | 2.291854 | 0.020451309               | *               |
| 0.5                         | 0.0704   | 0.060076 | 2.90165  | 0.016094103               | *               |
| 1                           | 3.759867 | 1.009881 | 3.844314 | 0.100376972               | ns              |
| 2.5                         | 2.364076 | 0.083094 | 4.303923 | 0.098386815               | ns              |
| 5                           | 1.977798 | 0.19702  | 4.065947 | 0.06809619                | ns              |
| 10                          | 3.342641 | 0.182592 | 4.539454 | 0.166651701               | ns              |

| Rapamycin ( $\mu\text{M}$ ) | N1       | N2       | N3       | P value (unpaired t-test) | P value summary |
|-----------------------------|----------|----------|----------|---------------------------|-----------------|
| 0                           | 4.436158 | 5.092271 | 5.234786 |                           |                 |
| 0.02                        | 1.384818 | 0.589124 | 0.404922 | 0.000443816               | ***             |
| 0.1                         | 0.572457 | 0.824523 | 0.792787 | 8.45152E-05               | ****            |
| 0.25                        | 0.634139 | 1.848483 | 0.53813  | 0.001312558               | **              |
| 0.5                         | 0.92913  | 2.019662 | 0.519494 | 0.001805299               | **              |
| 1                           | 1.058981 | 1.388657 | 0.739216 | 0.000237221               | ***             |
| 2.5                         | 0.638314 | 2.274558 | 0.810201 | 0.003049893               | **              |
| 5                           | 1.147923 | 2.352929 | 1.026192 | 0.002229715               | **              |
| 10                          | 2.351598 | 2.742253 | 1.355934 | 0.0044836                 | **              |

| Trametinib ( $\mu\text{M}$ ) | N1       | N2       | N3       | P value (unpaired t-test) | P value summary |
|------------------------------|----------|----------|----------|---------------------------|-----------------|
| 0                            | 4.436158 | 5.092271 | 5.234786 |                           |                 |

|      |          |          |          |             |     |
|------|----------|----------|----------|-------------|-----|
| 0.02 | 0.151467 | 1.080734 | 1.185539 | 0.000556382 | **  |
| 0.1  | 0.083611 | 0.665739 | 0.259651 | 0.000107365 | **  |
| 0.25 | 0.786689 | 0.707472 | 0.182089 | 0.000149115 | **  |
| 0.5  | 0.321086 | 0.31245  | 0.23474  | 4.7967E-05  | *** |
| 1    | 0.072152 | 0.737974 | 0.424846 | 0.000133541 | **  |
| 2.5  | 0.710333 | 0.455087 | 0.116617 | 0.000115836 | **  |
| 5    | 1.0127   | 0.543668 | 0.323217 | 0.000176298 | **  |
| 10   | 1.36565  | 1.104444 | 0.635525 | 0.000282849 | **  |

| Torkinib ( $\mu$ M) | N1       | N2       | N3       | P value (unpaired t-test) | P value summary |
|---------------------|----------|----------|----------|---------------------------|-----------------|
| 0                   | 4.436158 | 5.092271 | 5.234786 |                           |                 |
| 0.02                | 0.060061 | 4.219016 | 2.38585  | 0.092884036               | ns              |
| 0.1                 | 0.096376 | 3.853576 | 1.028349 | 0.047760487               | *               |
| 0.25                | 3.22367  | 3.580842 | 1.948369 | 0.022319788               | *               |
| 0.5                 | 4.486182 | 3.703686 | 2.558824 | 0.093789107               | ns              |
| 1                   | 6.14183  | 6.057751 | 2.760788 | 0.956798328               | ns              |
| 2.5                 | 4.029088 | 7.621206 | 2.308258 | 0.873778659               | ns              |
| 5                   | 2.443485 | 6.366542 | 1.471757 | 0.38030133                | ns              |
| 10                  | 1.551715 | 6.122449 | 1.072966 | 0.285487567               | ns              |

| PAKi ( $\mu$ M) | N1       | N2       | N3       | P value (unpaired t-test) | P value summary |
|-----------------|----------|----------|----------|---------------------------|-----------------|
| 0               | 4.436158 | 5.092271 | 5.234786 |                           |                 |
| 0.02            | 6.304357 | 5.648267 | 1.572224 | 0.796862228               | ns              |
| 0.1             | 2.605142 | 3.633267 | 0.997626 | 0.035689946               | *               |
| 0.25            | 0.299574 | 1.33067  | 0.277922 | 0.000547432               | **              |
| 0.5             | 0.088964 | 0.368569 | 0.11257  | 5.50566E-05               | ***             |
| 1               | 0.319423 | 0.286686 | 0.153473 | 4.92897E-05               | ***             |
| 2.5             | 0.553411 | 0.223358 | 0.208928 | 7.05048E-05               | ***             |
| 5               | 0.387318 | 3.479901 | 2.188556 | 0.035482131               | *               |
| 10              | 4.838459 | 3.630557 | 1.094781 | 0.199939867               | ns              |

Supplemental Figure 10a (Cell count)

|  | GFP control | DMSO | Alpelisib | Rapamycin | Trametinib | Torkinib |
|--|-------------|------|-----------|-----------|------------|----------|
|  | 439         | 976  | 679       | 641       | 880        | 670      |
|  | 481         | 1015 | 758       | 764       | 675        | 647      |

|                                   | 389         | 947                | 844              | 833     | 651              | 585     |
|-----------------------------------|-------------|--------------------|------------------|---------|------------------|---------|
|                                   |             |                    | 784              |         |                  |         |
| MEAN                              | 436.3333333 | 979.3333333        | 766.25           | 746     | 735.3333333      | 634     |
| SEM                               | 26.5916     | 19.7005            | 34.2062          | 56.1516 | 72.6644          | 25.3837 |
| Tukey's multiple comparisons test | Mean Diff.  | 95.00% CI of diff. | Below threshold? | Summary | Adjusted P Value |         |
| GFP control vs. PIK3CAE542K       | -543        | -748.8 to -337.2   | Yes              | ****    | <0.0001          |         |
| GFP control vs. Alpelisib 2.5uM   | -329.9      | -522.4 to -137.4   | Yes              | ***     | 0.0008           |         |
| GFP control vs. Sirolimus 1uM     | -309.7      | -515.4 to -103.9   | Yes              | **      | 0.0027           |         |
| GFP control vs. Trametinib        | -299        | -504.8 to -93.24   | Yes              | **      | 0.0036           |         |
| GFP control vs. Torkinib 5uM      | -197.7      | -403.4 to 8.095    | No               | ns      | 0.0627           |         |
| PIK3CAE542K vs. Alpelisib 2.5uM   | 213.1       | 20.61 to 405.6     | Yes              | *       | 0.0268           |         |
| PIK3CAE542K vs. Sirolimus 1uM     | 233.3       | 27.57 to 439.1     | Yes              | *       | 0.0229           |         |
| PIK3CAE542K vs. Trametinib        | 244         | 38.24 to 449.8     | Yes              | *       | 0.0169           |         |
| PIK3CAE542K vs. Torkinib 5uM      | 345.3       | 139.6 to 551.1     | Yes              | **      | 0.001            |         |
| Alpelisib 2.5uM vs. Sirolimus 1uM | 20.25       | -172.2 to 212.7    | No               | ns      | 0.9991           |         |
| Alpelisib 2.5uM vs. Trametinib    | 30.92       | -161.6 to 223.4    | No               | ns      | 0.9937           |         |
| Alpelisib 2.5uM vs. Torkinib 5uM  | 132.3       | -60.22 to 324.7    | No               | ns      | 0.2689           |         |
| Sirolimus 1uM vs. Trametinib      | 10.67       | -195.1 to 216.4    | No               | ns      | >0.9999          |         |
| Sirolimus 1uM vs. Torkinib 5uM    | 112         | -93.76 to 317.8    | No               | ns      | 0.495            |         |
| Trametinib vs. Torkinib 5uM       | 101.3       | -104.4 to 307.1    | No               | ns      | 0.5932           |         |

Supplemental Figure 10b (Fibrin Void Volume)

|  | GFP control | DMSO      | Alpelisib | Rapamycin | Trametinib  | Torkinib |
|--|-------------|-----------|-----------|-----------|-------------|----------|
|  | 1378310     | 114000000 | 5228440   | 8343005   | 8052925.491 | 2041528  |
|  | 1776301     | 60849879  | 7490028   | 9827182   | 5698440.969 | 3180299  |
|  | 1501003     | 53909663  | 4045672   | 9865495   | 6640777.851 | 1631008  |
|  |             |           |           | 8182002   |             |          |
|  |             |           |           | 14530380  |             |          |

|                                    |             |                         |                  |              |                  |             |
|------------------------------------|-------------|-------------------------|------------------|--------------|------------------|-------------|
| MEAN                               | 1551871.333 | 76253180.67             | 5588046.667      | 10149612.8   | 6797381.437      | 2284278.333 |
| SEM                                | 117671.7178 | 18979448.7703           | 1010426.4413     | 1151328.1420 | 684176.5984      | 463418.9767 |
| Tukey's multiple comparisons test  | Mean Diff.  | 95.00% CI of diff.      | Below threshold? | Summary      | Adjusted P Value |             |
| GFP control vs. PIK3CAE542K        | -74701309   | -108258342 to -41144277 | Yes              | ****         | <0.0001          |             |
| GFP control vs. Alpelisib 2.5uM    | -4036175    | -37593208 to 29520857   | No               | ns           | 0.9985           |             |
| GFP control vs. Sirolimus 1uM      | -8597741    | -38612064 to 21416581   | No               | ns           | 0.9293           |             |
| GFP control vs. 1uM Trametinib     | -5245510    | -38802543 to 28311523   | No               | ns           | 0.9948           |             |
| GFP control vs. Torkinib 5uM       | -732407     | -34289440 to 32824626   | No               | ns           | >0.9999          |             |
| PIK3CAE542K vs. Alpelisib 2.5uM    | 70665134    | 37108101 to 104222167   | Yes              | ****         | <0.0001          |             |
| PIK3CAE542K vs. Sirolimus 1uM      | 66103568    | 36089245 to 96117890    | Yes              | ****         | <0.0001          |             |
| PIK3CAE542K vs. 1uM Trametinib     | 69455799    | 35898767 to 103012832   | Yes              | ***          | 0.0001           |             |
| PIK3CAE542K vs. Torkinib 5uM       | 73968902    | 40411870 to 107525935   | Yes              | ****         | <0.0001          |             |
| Alpelisib 2.5uM vs. Sirolimus 1uM  | -4561566    | -34575889 to 25452756   | No               | ns           | 0.9954           |             |
| Alpelisib 2.5uM vs. 1uM Trametinib | -1209335    | -34766367 to 32347698   | No               | ns           | >0.9999          |             |
| Alpelisib 2.5uM vs. Torkinib 5uM   | 3303768     | -30253264 to 36860801   | No               | ns           | 0.9994           |             |
| Sirolimus 1uM vs. 1uM Trametinib   | 3352231     | -26662091 to 33366554   | No               | ns           | 0.9989           |             |
| Sirolimus 1uM vs. Torkinib 5uM     | 7865334     | -22148988 to 37879657   | No               | ns           | 0.9502           |             |
| 1uM Trametinib vs. Torkinib 5uM    | 4513103     | -29043930 to 38070136   | No               | ns           | 0.9974           |             |

Supplemental Figure 10c (Branch Points)

|      | GFP control | Alpelisib   | Rapamycin | Trametinib  | Torkinib |
|------|-------------|-------------|-----------|-------------|----------|
|      | 265         | 366         | 545       | 1180        | 424      |
|      | 219         | 357         | 513       | 656         | 286      |
|      | 248         | 380         | 878       | 716         | 454      |
|      |             |             | 674       |             |          |
|      |             |             | 724       |             |          |
| MEAN | 244         | 367.6666667 | 666.8     | 850.6666667 | 388      |
| SEM  | 13.4288     | 6.6916      | 65.7339   | 165.5751    | 51.7301  |



| Tukey's multiple comparisons test  | Mean Diff. | 95.00% CI of diff. | Below threshold? | Summary | Adjusted P Value |
|------------------------------------|------------|--------------------|------------------|---------|------------------|
| GFP control vs. Alpelisib 2.5uM    | -123.7     | -512.8 to 265.5    | No               | ns      | 0.8447           |
| GFP control vs. Sirolimus 1uM      | -422.8     | -770.9 to -74.72   | Yes              | *       | 0.0155           |
| GFP control vs. 1uM Trametinib     | -606.7     | -995.8 to -217.5   | Yes              | **      | 0.0024           |
| GFP control vs. Torkinib 5uM       | -144       | -533.2 to 245.2    | No               | ns      | 0.7625           |
| Alpelisib 2.5uM vs. Sirolimus 1uM  | -299.1     | -647.2 to 48.94    | No               | ns      | 0.1056           |
| Alpelisib 2.5uM vs. 1uM Trametinib | -483       | -872.2 to -93.84   | Yes              | *       | 0.0134           |
| Alpelisib 2.5uM vs. Torkinib 5uM   | -20.33     | -409.5 to 368.8    | No               | ns      | 0.9998           |
| Sirolimus 1uM vs. 1uM Trametinib   | -183.9     | -531.9 to 164.2    | No               | ns      | 0.4778           |
| Sirolimus 1uM vs. Torkinib 5uM     | 278.8      | -69.28 to 626.9    | No               | ns      | 0.1424           |
| 1uM Trametinib vs. Torkinib 5uM    | 462.7      | 73.51 to 851.8     | Yes              | *       | 0.0178           |

Supplemental Figure 11a (Cell count)

|      | DMSO       | Torkinib    | Raci     | PAKi     |
|------|------------|-------------|----------|----------|
|      | 0.902033   | 0.937367    | 0.607947 | 0.842312 |
|      | 1.047607   | 0.815698    | 0.550858 | 0.814934 |
|      | 1.050359   | 0.856639    | 0.535952 | 0.751928 |
| MEAN | 0.99999667 | 0.869901333 | 0.564919 | 0.803058 |
| SEM  | 0.0490     | 0.0357      | 0.0219   | 0.0268   |

  

| Dunnett's multiple comparisons test | Mean Diff. | 95.00% CI of diff. | Below threshold? | Summary | Adjusted P Value |
|-------------------------------------|------------|--------------------|------------------|---------|------------------|
| PIK3CA-E542K vs. torkinib           | 0.1301     | -0.01208 to 0.2723 | No               | ns      | 0.0719           |
| PIK3CA-E542K vs. raci               | 0.4351     | 0.2929 to 0.5773   | Yes              | ****    | <0.0001          |
| PIK3CA-E542K vs. paki               | 0.1969     | 0.05477 to 0.3391  | Yes              | *       | 0.0102           |

Supplemental Figure 11c (Volume of void spaces)

|      | DMSO          | 0.1 µM PAKi  | 1 µM PAKi    | 2.5 µM PAKi   | 5 µM PAKi    |
|------|---------------|--------------|--------------|---------------|--------------|
|      | 83330564.1    | 65571651     | 50206379     | 38044204      | 5906788      |
|      | 125061809.1   | 49404196     | 44938349     | 14419797      | 5179676      |
|      | 93485369      | 69621863     | 29044336     | 62476228      | 18331890     |
| MEAN | 100625914.1   | 61532570     | 41396354.67  | 38313409.67   | 9806118      |
| SEM  | 12564695.7809 | 6175870.9568 | 6360485.0150 | 13873349.6782 | 4268050.4571 |

| Tukey's multiple comparisons test | Mean Diff. | 95.00% CI of diff.                 | Below threshold? | Summary | Adjusted P Value |
|-----------------------------------|------------|------------------------------------|------------------|---------|------------------|
| DMSO vs. 0.1 paki                 | 39093344   | -4921349 to 83108037               | No               | ns      | 0.0882           |
| DMSO vs. 1 paki                   | 59229559   | 15214867 to 18297812 to 103244252  | Yes              | **      | 0.0087           |
| DMSO vs. 2.5 paki                 | 62312504   | 106327197 to 46805103 to 134834489 | Yes              | **      | 0.0062           |
| DMSO vs. 5 paki                   | 90819796   | -23878477 to 134834489             | Yes              | ***     | 0.0004           |
| 0.1 paki vs. 1 paki               | 20136215   | 64150908 to -20795532 to 67233853  | No               | ns      | 0.5814           |
| 0.1 paki vs. 2.5 paki             | 23219160   | 7711759 to 95741145                | No               | ns      | 0.4562           |
| 0.1 paki vs. 5 paki               | 51726452   | -40931748 to 47097638              | Yes              | *       | 0.0205           |
| 1 paki vs. 2.5 paki               | 3082945    | -12424456 to 75604929              | No               | ns      | 0.9993           |
| 1 paki vs. 5 paki                 | 31590237   | -15507401 to 72521984              | No               | ns      | 0.203            |
| 2.5 paki vs. 5 paki               | 28507292   |                                    | No               | ns      | 0.2791           |

Supplemental Figure 11d (Cell count)

|      | DMSO        | 0.1 µM PAKi | 1 µM PAKi   | 2.5 µM PAKi | 5 µM PAKi   |
|------|-------------|-------------|-------------|-------------|-------------|
|      | 1100        | 502         | 527         | 502         | 429         |
|      | 1000        | 592         | 475         | 431         | 475         |
|      | 980         | 527         | 506         | 485         | 451         |
| MEAN | 1026.666667 | 540.3333333 | 502.6666667 | 472.6666667 | 451.6666667 |
| SEM  | 37.1184     | 26.8225     | 15.1033     | 21.4035     | 13.2832     |

  

| Tukey's multiple comparisons test | Mean Diff. | 95.00% CI of diff. | Below threshold? | Summary | Adjusted P Value |
|-----------------------------------|------------|--------------------|------------------|---------|------------------|
| DMSO vs. 0.1 paki                 | 486.3      | 373.1 to 599.6     | Yes              | ****    | <0.0001          |
| DMSO vs. 1 paki                   | 524        | 410.8 to 637.2     | Yes              | ****    | <0.0001          |
| DMSO vs. 2.5 paki                 | 554        | 440.8 to 667.2     | Yes              | ****    | <0.0001          |
| DMSO vs. 5 paki                   | 575        | 461.8 to 688.2     | Yes              | ****    | <0.0001          |
| 0.1 paki vs. 1 paki               | 37.67      | -75.58 to 150.9    | No               | ns      | 0.8056           |
| 0.1 paki vs. 2.5 paki             | 67.67      | -45.58 to 180.9    | No               | ns      | 0.346            |
| 0.1 paki vs. 5 paki               | 88.67      | -24.58 to 201.9    | No               | ns      | 0.1487           |
| 1 paki vs. 2.5 paki               | 30         | -83.24 to 143.2    | No               | ns      | 0.9009           |
| 1 paki vs. 5 paki                 | 51         | -62.24 to 164.2    | No               | ns      | 0.5946           |
| 2.5 paki vs. 5 paki               | 21         | -92.24 to 134.2    | No               | ns      | 0.9702           |
